1 Low Affinity Binding Sites in an Activating CRM Mediate Negative Autoregulation of the  
2 *Drosophila* Hox Gene *Ultrabithorax*

3

4 Rebecca K Delker<sup>1¶</sup>, Vikram Ranade<sup>3¶</sup>, Ryan Loker<sup>3</sup>, Roumen Voutev<sup>1</sup>, Richard S  
5 Mann<sup>1,2\*</sup>

6 1. Department of Biochemistry and Molecular Biophysics, Columbia University, New  
7 York, NY, USA

8 2. Department of Neuroscience, Mortimer B. Zuckerman Mind Brain Behavior Institute,  
9 Columbia University, New York, NY, USA

10 3. Department of Genetics, Columbia University, New York, NY, USA

11

12 \* Corresponding author

13 Email: rsm10@columbia.edu

14

15 ¶ These authors contributed equally to this work

16

17

18 **Abstract**

19 Specification of cell identity and the proper functioning of a mature cell depend on  
20 precise regulation of gene expression. Both binary ON/OFF regulation of transcription,  
21 as well as more fine-tuned control of transcription levels in the ON state, are required to  
22 define cell types. The *Drosophila melanogaster* Hox gene, *Ultrabithorax (Ubx)*, exhibits  
23 both of these modes of control during development. While ON/OFF regulation is needed  
24 to specify the fate of the developing wing (*Ubx* OFF) and haltere (*Ubx* ON), the levels of  
25 *Ubx* within the haltere differ between compartments along the proximal-distal axis. Here,  
26 we identify and molecularly dissect the novel contribution of a previously identified *Ubx*  
27 cis-regulatory module (CRM), *anterobithorax (abx)*, to a negative auto-regulatory loop  
28 that maintains decreased *Ubx* expression in the proximal compartment of the haltere as  
29 compared to the distal compartment. We find that *Ubx*, in complex with the known Hox  
30 cofactors, Homothorax (Hth) and Extradenticle (Exd), acts through low-affinity *Ubx*-Exd  
31 binding sites to reduce the levels of *Ubx* transcription in the proximal compartment.  
32 Importantly, we also reveal that *Ubx*-Exd-binding site mutations sufficient to result in de-  
33 repression of *abx* activity in the proximal haltere in a transgenic context are not  
34 sufficient to de-repress *Ubx* expression when mutated at the endogenous locus,  
35 suggesting the presence of multiple mechanisms through which *Ubx*-mediated  
36 repression occurs. Our results underscore the complementary nature of CRM analysis  
37 through transgenic reporter assays and genome modification of the endogenous locus;  
38 but, they also highlight the increasing need to understand gene regulation within the  
39 native context to capture the potential input of multiple genomic elements on gene  
40 control.

41

42 **Author Summary**

43

44         One of the most fundamental questions in biology is how information encoded in  
45 the DNA is translated into the diversity of cell-types that exist within a multicellular  
46 organism, each with the same genome. Regulation at the transcriptional level, mediated  
47 through the activity of transcription factors bound to *cis*-regulatory modules (CRMs),  
48 plays a key role in this process. While we typically distinguish cell-type by the specific  
49 subset of genes that are transcriptionally ON or OFF, it is also important to consider the  
50 more fine-tuned transcriptional control of gene expression level. We focus on the  
51 regulatory logic of the Hox developmental regulator, *Ultrabithorax (Ubx)*, in fruit flies,  
52 which exhibits both forms of transcriptional control. While ON/OFF control of *Ubx* is  
53 required to define differential appendage fate in the T2 and T3 thoracic segments,  
54 respectively, more fine-tuned control of transcription levels is observed in distinct  
55 compartments within the T3 appendage, itself, in which all cells exhibit a *Ubx* ON state.  
56 Through genetic analysis of regulatory inputs, and dissection of a *Ubx* CRM in a  
57 transgenic context and at the endogenous locus, we reveal a compartment-specific  
58 negative autoregulatory loop that dampens *Ubx* transcription to maintain distinct  
59 transcriptional levels within a single developing tissue.

60

61 **Introduction**

62

63 Though often described as the blueprint of an organism, the genome – and its  
64 underlying code – remains undecipherable unless understood within a cellular context.  
65 This is because, in addition to genomic sequence, knowledge of the subset of genes  
66 expressed throughout space and time is required. In eukaryotic cells, this transcriptional  
67 regulation is governed by the presence of non-coding cis-regulatory modules (CRMs)  
68 through which the binding of transcription factors (TFs) can either positively or  
69 negatively affect the expression of target genes. While it is common to think of cell  
70 identity as a product of a binary ON vs. OFF control of transcription, an added layer of  
71 complexity is gained by recognizing that the quantitative amount (the level/dose) of  
72 gene expression of both TFs and their downstream targets can also impact cell identity  
73 and/or function (1-3). Here, studying the Hox gene, *Ultrabithorax (Ubx)*, in *Drosophila*  
74 *melanogaster (D. melanogaster)*, we explore the question of how gene expression can  
75 be tuned once in an ON transcriptional state.

76  
77 *Ultrabithorax (Ubx)*, required during development at both embryonic and larval  
78 stages, is likely best known for its role in the differential development of the second and  
79 third thoracic dorsal appendages, the wing (T2) and haltere (T3), respectively (4). These  
80 serially homologous structures are derived from larval imaginal discs that differ primarily  
81 in the expression of *Ubx*: a *Ubx* OFF state is required for wing development, while a  
82 *Ubx* ON state is required for haltere development (5-8). While this demonstrates the  
83 importance of an ON/OFF binary mode of control for *Ubx* expression during  
84 development, it is also important to note that, although *Ubx* is detected in all cells of the  
85 haltere disc, distinct levels of *Ubx* expression occur along the proximal distal axis

86 (Figure 1A, B). While distal cells exhibit high levels of *Ubx*, proximal cells exhibit low  
87 levels of *Ubx*, resulting in a distal/proximal ratio  $> 1$ . This observation raises questions  
88 not only of the downstream effects of high versus low *Ubx* expression on cell- and  
89 tissue-fate, but also of the mechanisms by which *Ubx* levels are regulated in proximal  
90 versus distal compartments. While the first question remains unanswered, here, we  
91 address the latter question and provide evidence for the presence of an autoregulatory  
92 mechanism in which *Ubx* directly represses its own expression within the proximal  
93 compartment of the developing haltere.

94

95         The regulation of *Ubx*, like many developmental regulators that need to be  
96 expressed in very precise spatio-temporal patterns, relies on input from a number of  
97 CRMs throughout its large, ~120 kb locus (7,9-15). We find a novel role for a previously  
98 identified *Ubx* CRM, termed *anterobithorax* (*abx*), located within the large third intron of  
99 *Ubx*. Established as an enhancer necessary for activation of *Ubx* within the anterior  
100 compartment of the haltere ((9,11) and Figure 3A, B), we find that *abx* also serves a  
101 crucial role in the negative autoregulation of *Ubx* that results in distinct levels of  
102 expression in the proximal versus distal compartments of the haltere disc. Thus,  
103 interestingly, we find that a single CRM is utilized for both activating and repressive  
104 functions within the same tissue.

105

106 While this is not the first observation of *Ubx* autoregulation (13,16,17), it does offer  
107 additional insight into our understanding of autoregulatory mechanisms, as well as the  
108 potential utility of autoregulation. Previously characterized examples of *Ubx* negative

109 autoregulation highlight the importance of autoregulation to buffer against increases in  
110 Ubx protein level, either from ectopic pulses of transgenic Ubx or from more subtle  
111 increases in *Ubx* copy number via chromosomal aberrations containing duplications of  
112 the *Ubx* locus (13,16). In each of these scenarios, an increase in Ubx protein resulted in  
113 repression of the endogenous locus or repression of CRMs (as readout by Gal4  
114 insertions) within the locus, respectively.

115

116 In contrast, we present a role for negative autoregulation in establishing distinct levels of  
117 *Ubx* between compartments within a single tissue during normal development.  
118 Additionally, we molecularly dissect this autoregulatory mechanism in both a transgenic  
119 context, where we can isolate the contribution of a small cluster of low affinity Ubx-Exd  
120 binding sites to decrease proximal Ubx levels, and in an endogenous context, where  
121 multiple binding sites and mechanisms are likely required to achieve autoregulation. Our  
122 results underscore the complementary nature of transgenic and endogenous  
123 modification approaches to understanding gene regulation, and highlight the increasing  
124 importance of interrogating this problem within the complexity of the native locus  
125 enabled by new technologies like CRISPR (18).

126

## 127 **Results**

128

129 *Proximal/Distal (PD) Expression Bias of Ubx is Established at the Level of Transcription*

130

131           The importance of *Ubx* expression for haltere fate was established decades ago  
132 by the discovery of mutations that resulted in a loss of *Ubx* function in the developing  
133 haltere and the concomitant production of four-winged flies (15,19,20). Here,  
134 misregulation of the ON/OFF *Ubx* expression switch results in a complete homeotic  
135 transformation of the haltere to the wing. Similarly, gain of function of *Ubx* in the  
136 developing wing results in a near complete transformation of wing to haltere (8,21). In  
137 addition, more subtle changes in *Ubx* expression level have also been shown to result  
138 in malformations of the adult appendage: decreases in *Ubx* dose lead to a slightly  
139 enlarged haltere (16) and increases in *Ubx* dose result in decreased adult haltere size –  
140 though size is buffered to a certain extent against changes in *Ubx* dose (16,22). While  
141 this establishes the importance of maintaining appropriate levels of *Ubx* expression in a  
142 given tissue context, and the presence of autoregulatory responses to genetic  
143 perturbation to maintain levels within the appropriate window, it does not address  
144 mechanisms present during normal development to establish differential expression  
145 levels between compartments in a single tissue.

146

147           In third instar larval haltere imaginal discs, *Ubx* is expressed at higher levels in  
148 the distal region than in the proximal region (Figure 1A, B) offering a system to probe  
149 how different expression levels are established. This differential *Ubx* expression pattern  
150 can be seen at both the level of total cellular protein (Figure 1B) – quantified to reveal  
151 an average distal/proximal ratio of 1.67 (Figure 1B', Figure 1 Supplemental Figure 1) –  
152 and at the level of nascent RNA production (Figure 1C), providing evidence that the  
153 proximal-distal bias is established, at least in part, due to transcriptional control. These

154 findings are additionally corroborated by the presence of a proximal-distal bias in the  
155 activity of several Gal4 enhancer-trap lines, including *Ubx-lacZ<sup>HC166D</sup>* (Figure 1D, left)  
156 (23), which presumably captures input from multiple CRMs required for the  
157 establishment of the observed proximal-distal bias. Interestingly, RNAi-mediated clonal  
158 reduction of proximal Ubx elevates levels of LacZ driven by *Ubx-lacZ<sup>HC166D</sup>* to distal  
159 levels (Figure 1D, right). Taken together, these results suggest that the observed  
160 proximal-distal bias is established through the active repression of proximal Ubx levels  
161 at the level of transcriptional control and that this occurs, either directly or indirectly,  
162 through *Ubx* activity.

163

164 *Proximal autorepression of Ubx relies on Hox cofactors Hth/Exd*

165

166         The establishment of the PD bias through proximally-restricted repression  
167 suggests the existence of a factor that is similarly restricted to the proximal  
168 compartment. We therefore investigated the potential contribution of the well-  
169 established Hox cofactors, Homothorax (Hth) and Extradenticle (Exd). *hth* expression is  
170 restricted to the proximal compartment, with the exception of expression in the dorsal,  
171 distal hinge (Figure 2A, asterisk), thus largely mirroring the pattern of low *Ubx* (Figure  
172 2A). To test if Hth represses *Ubx* transcription in the proximal haltere, we generated *hth*  
173 null (*hth<sup>P2</sup>*) clones and performed immunostaining against endogenous Ubx protein. In  
174 the absence of Hth, we observed a de-repression of proximal Ubx, indicating the  
175 involvement of Hth in the downregulation of *Ubx* in the proximal haltere (Figure 2B).

176



177 Given the involvement of Hth, we next tested the role of *exd* – which encodes an  
178 obligate binding partner of Hth. Hth interacts directly with Exd and is required to  
179 translocate Exd from the cytoplasm of the nucleus (24). In the distal haltere disc, where  
180 Hth is absent, Exd is cytoplasmic and seemingly non-functional. To test if Exd works  
181 along with Hth to repress *Ubx* transcription in the proximal haltere, we generated *exd*  
182 null clones with two different alleles (*exd*<sup>1</sup> and *exd*<sup>2</sup>). As we saw for *hth*<sup>P2</sup> clones, loss of  
183 Exd in the proximal (but not distal) haltere resulted in de-repression of *Ubx* (Figure 2D,  
184 Figure 2 Supplemental Figure 1A). This result contrasts with a previous report showing  
185 loss of Ubx protein in *exd*<sup>2</sup> mutant clones, implying the positive regulation of *Ubx* by Exd  
186 (25). To resolve this discrepancy, we further tested the role of Exd by knocking it down  
187 in clones expressing *exd* RNAi. In these clones, and in agreement with our *exd* null  
188 clones, proximal Ubx levels are elevated (Figure 2 Supplemental 1B).

189  
190 Three known isoforms of Hth exist due to alternative splicing of the locus: a full-  
191 length isoform that contains a homeodomain and is thus able to bind DNA (Hth<sup>FL</sup>) and  
192 two homeodomain-less isoforms that cannot directly bind DNA and are thus reliant on  
193 complex formation for recruitment to DNA (collectively referred to as Hth<sup>HM</sup>) (26). To test  
194 if Hth requires its homeodomain for proximal *Ubx* repression, we generated clones of  
195 the *hth*<sup>100-1</sup> allele, which only produces Hth<sup>HM</sup> due to a premature stop codon before the  
196 homeodomain (27). In these clones, and thus in the absence of Hth<sup>FL</sup>, Ubx levels are  
197 not elevated and the PD bias remains intact (Figure 2C). Thus, although Hth is  
198 necessary for proximal *Ubx* repression, direct binding of Hth to DNA is dispensable; HD-  
199 less isoforms of Hth are sufficient for the bias in Ubx levels along the PD axis.

200

201           Given the evidence for the repressive effects of Hth on *Ubx* expression, we  
202 sought to understand if there was mutual repression between the two factors. We  
203 generated *Ubx* null (*Ubx*<sup>9-22</sup>) mitotic clones and performed immunostaining against Hth  
204 protein. In the absence of *Ubx*, Hth protein levels were unaffected suggesting that, while  
205 Hth represses *Ubx*, *Ubx* does not repress *hth* (Figure 2F). These results were confirmed  
206 by immunostaining for Exd protein in *Ubx* null clones (Figure 2E). As Hth is required for  
207 the translocation of Exd to the nucleus, the subcellular localization of Exd can serve as  
208 a readout for the presence or absence of Hth. In the presence of Hth, Exd is nuclear,  
209 but if Hth is lost upon induction of *Ubx* null clones, Exd should become cytosolic.  
210 However, contrary to this prediction, the levels of Exd and subcellular localization of Exd  
211 are unaffected in *Ubx* null clones (Figure 2E).

212

### 213 *A Ubx-regulated Module within the Intronic abx CRM Mediates autorepression*

214

215           Previous work on the *cis*-regulatory logic of *Ubx* identified two large spatially  
216 distinct genomic regulatory regions: a region upstream of the TSS (Upstream Control  
217 Region – UCR) that regulates *Ubx* in parasegment 6 (PS6) and the posterior haltere,  
218 and a region within the large third intron of *Ubx* (Downstream Control Region – DCR)  
219 that regulates *Ubx* in PS5 and anterior haltere (11,14). While a 35 kb UCR fragment  
220 (35UZ) drives reporter expression in the posterior haltere, various fragments derived  
221 from the DCR, termed the *anterobithorax* (*abx*) CRM, drive reporter expression  
222 throughout the haltere that recapitulates *Ubx* expression, including the presence of a

223 PD bias (11,13). In addition, classically defined alleles of the *Ubx* locus affecting  
224 anterior expression in the haltere are located within the *abx* region (12)(7). Smaller  
225 fragments of *abx* of 6.8 kb (*abx6.8*) and 3.2 kb (*abx3.2*) were sufficient to recapitulate  
226 the *Ubx* expression pattern, including the PD bias, in the haltere (Figure 3A) (11). These  
227 fragments also drive reporter expression in other imaginal discs where *Ubx* expression  
228 is absent, presumably due to the absence of a necessary repressive element, such as a  
229 Polycomb Response Element (PRE) (Figure 3C).

230

231 That the *abx* region functions as a *cis*-regulatory module is further corroborated  
232 by published FAIRE-seq data that shows a broad region of open chromatin particularly  
233 within the domains of the two small *abx* fragments, *abx6.8* and *abx3.2* – hereafter called  
234 *abxFAIRE* (Figure 3A). Not only is this region specifically accessible in the haltere as  
235 compared to the wing (Figure 3A, track 1 versus track 2), but it also displays both *Ubx*  
236 and *Hth* binding, as assayed by previous CHIP-chip experiments (Figure 3A, track 3 and  
237 4) (28,29). Consistent with these earlier results, clonal deletion of *abxFAIRE* results in a  
238 decrease in *Ubx* levels – ranging from a slight reduction to complete loss – in both  
239 proximal and distal cells throughout the anterior of the haltere disc (Figure 3B, Figure 3  
240 Supplemental 1B, B') (9). Despite this activating activity, *abx*-driven reporter expression  
241 maintains the PD bias, suggesting that this element may also contain sequences  
242 required for down-regulation of *Ubx* in the proximal haltere.

243

244 Within *abxFAIRE* we focused on a ~1.4 kb fragment (*abxF*) that included the  
245 highest enrichment for both *Ubx* and *Hth* binding in CHIP experiments (Figure 3A). As

246 expected based on prior reports, *abxF-lacZ* reporter constructs recapitulate *Ubx*  
247 expression throughout the haltere, including the PD bias (Figure 3C) (11). Similar to  
248 native *Ubx* levels, reporter expression driven by *abxF* is elevated in the absence of  
249 either Hth or Exd, as determined by examining mitotic clones null for each gene (Figure  
250 3D, 3E). Further, as with native *Ubx* levels, proximal repression of *abxF* activity does  
251 not require the full-length isoform of Hth (Figure 3F), confirming that direct DNA binding  
252 of Hth is unnecessary for the PD bias. Finally, *Ubx* null mitotic clones (*Ubx<sup>9-22</sup>*) similarly  
253 results in a de-repression of proximal *abxF* activity to levels comparable to that in the  
254 distal pouch (Figure 3G). Taken together, these results confirm that the *abxF* fragment  
255 is able to capture the input of Ubx-Hth-Exd in proximal repression and the concomitant  
256 establishment of the PD bias, providing evidence for a dual role for *abx* in mediating  
257 both activation (distally and proximally) and partial repression (proximally). Thus, *abxF*  
258 provides a platform to more finely dissect the mechanism of auto-repression by Ubx and  
259 its cofactors.

260

261 *Ubx directly binds abx to auto-repress in the proximal compartment*

262

263         Given that the *abxF* CRM recapitulates *Ubx* expression bias along the PD axis,  
264 and that ChIP-chip results indicate that Ubx is bound at this location, we attempted to  
265 identify a Ubx binding site in *abxF* (28). As a first step, we minimized the 1.4 kb *abxF*  
266 fragment and identified a 531 bp minimal autoregulatory CRM, *abxN*, which  
267 recapitulates the expression pattern of the larger *abxF* fragment, and *Ubx* itself (Figure  
268 4A) when driving a *lacZ* reporter. Using the recently developed versatile maximum

269 likelihood framework, *No Read Left Behind (NRLB)*, to predict Ubx-Exd dimer binding,  
270 we identified two clusters of low affinity Ubx-Exd binding sites (Relative Affinity  $> 10^{-3}$ ,  
271 Figure 4B) (30). Mutation of each binding site cluster to abrogate Ubx binding (Figure  
272 4B') followed by immunostaining of the *lacZ* reporter revealed a decrease in PD bias,  
273 though this was more severe following mutation of Cluster 1 (Figure 4C, quantified in  
274 4C'). In fact, mutation of both clusters together exhibited a PD bias defect comparable  
275 to that of Cluster 1 alone (Figure 4C, quantified in 4C'). Using both *in vitro* and *in vivo*  
276 techniques, we next established that Ubx can bind directly to *abxN* together with its  
277 cofactors. *In vitro* EMSAs revealed the binding of Ubx-Exd-Hth<sup>HM</sup> to a probe containing  
278 the Cluster 1 binding sites. Importantly, this binding was lost upon mutation of these  
279 sites (Figure 4 Supplemental 1B); and, *in vivo* ChIP-qPCR was used to demonstrate  
280 Ubx binding to both the endogenous *abxN* CRM (recapitulating published ChIP-chip  
281 data) and the transgenic CRM-*lacZ* reporter gene (28). Again, mutation of Cluster 1  
282 binding sites resulted in decreased occupancy of Ubx at transgenic *abxN* (Figure 4  
283 Supplemental 1C). Further, *Ubx* null clones generated in the background of a Cluster 1-  
284 mutated *abxN-lacZ* transgene revealed no further de-repression (Figure 4 Supplement  
285 1A), providing additional evidence that the repressive activity of Ubx occurs through  
286 direct binding of *abxN* via Cluster 1 binding sites.

287

288         It is important to note that while it is clear that this reduction in PD bias results in  
289 part from an increase in proximal reporter expression, a decrease in distal reporter  
290 expression, particularly within the distal hinge region, is also apparent as a  
291 consequence of mutating Cluster 1. These results could suggest an additional

292 autoregulatory mechanism within the distal compartment that functions in an inverse  
293 manner; however, this was not supported by any of our other genetic analyses, and  
294 thus further experiments would be necessary to support this conclusion.

295

296 All of the predicted binding sites within *abxN*, including those found within Cluster  
297 1, are low affinity binding sites, defined as less than 0.1% of the maximal binding site  
298 affinity in the genome (31). Interestingly, when we mutate Cluster 1 to contain a high  
299 affinity binding site as determined by *in vitro* SELEX experiments and *NRLB* predictions  
300 (Figure 4B’), levels of the *lacZ* reporter within the proximal compartment are decreased  
301 and the PD bias is increased accordingly (Figure 4C and 4C’) (31). Not only does this  
302 result support the autoregulatory role of Ubx in controlling the PD bias – increasing the  
303 binding affinity results in greater proximal repression – but it also suggests the  
304 functional importance of low affinity binding sites (32,33). In this case, low affinity  
305 binding sites may allow for a more tunable state of transcription that is responsive to  
306 changes in TF levels. Here, *abx* low affinity binding sites appear to be optimized to  
307 produce the correct amount of *Ubx* repression.

308

309 *Mutation of abxN at the native locus is not sufficient to alter the Proximal-Distal bias*

310

311 Having established the proximally-restricted repressive role of Ubx on *abxN* to  
312 form the PD bias in a transgenic context, we sought to understand this phenomenon at  
313 the endogenous locus. To this end we devised a two-step strategy that utilizes  
314 CRISPR/Cas9 genome engineering along with PhiC31 based recombinase mediated

315 cassette exchange (PhiC31 RMCE) to replace the native, wildtype *abx* CRM with Ubx-  
316 binding site mutant varieties (Figure 5B). Two replacements were performed: one that  
317 encompasses the entirety of *abxFAIRE*, including *abxF* and *abxN* (*Targeted Region*<sup>4kb</sup>,  
318 ~4 kb), and a second that encompasses *abxN* (*Targeted Region*<sup>2kb</sup>, ~2.2 kb, Figure 5A).  
319 These “*abx*-replacement platforms,” verified by both PCR and Southern Blot analysis,  
320 were then used to re-insert *abx* sequences (via RMCE) with and without the desired  
321 Ubx-Exd binding site mutants (Figure 5B). Because this is not a scarless editing  
322 strategy, it was important to confirm that the sites remaining as a product of attP/attB  
323 recombination did not affect *Ubx* expression. To test this, we used RMCE to reinsert the  
324 wildtype sequence of each targeted region (*Targeted Region*<sup>2kb</sup> in Figure 5 and Figure 5  
325 Supplemental 1; *Targeted Region*<sup>4kb</sup> in Figure 6 and Figure 6 Supplemental 1) such that  
326 the only difference between the engineered allele and the native allele is the presence  
327 of the recombinase sites. The wildtype *abx* replacement alleles were able to  
328 homozygose, and homozygous flies developed normally with no noticeable defect. In  
329 addition, the generation of clones that are homozygous for the wildtype *abx*  
330 replacement alleles showed no differences in *Ubx* expression compared to neighboring  
331 wild type cells, as assayed at the protein level by immunostaining (Figure 5  
332 Supplemental 1A, top panel and Figure 6 Supplemental 1B, top panel).

333

334       Having established that these RMCE platforms do not affect *Ubx* expression, we  
335 next sought to understand the effect of Ubx binding site mutants within the context of  
336 the *Ubx* locus on proximal repression and the formation of the PD bias. Because the  
337 mutation of Cluster 1 binding sites showed a greater reduction in the PD bias in our

338 transgenic studies, we used our 2 kb replacement platform (Targeted Region<sup>2kb</sup>) to  
339 generate *abxN* replacement alleles containing mutations to either abrogate Ubx-Exd  
340 binding (*abxN-Cluster1<sup>Kill</sup>*) or enhance Ubx-Exd binding (*abxN-Cluster1<sup>Hi</sup>*). While each of  
341 these mutations altered the PD bias in the context of the transgenic *lacZ* reporter,  
342 neither perturbed the PD bias of Ubx, as assayed at the protein level. This was true  
343 whether we assayed *Ubx* expression in haltere discs homozygous for the *abxN*-  
344 *Cluster1<sup>Kill</sup>* allele (Figure 5C, quantified in 5C') or through the generation of homozygous  
345 *abxN-Cluster1<sup>Kill</sup>* clones (Figure 5 Supplemental 1A). Thus, mutation of a single cluster  
346 of low affinity Ubx-Exd binding sites within the >100 kb *Ubx* locus is insufficient to  
347 impact Ubx expression.

348

349 *Multiple low affinity Ubx-Exd binding sites are required for PD bias formation*

350

351 The disparity between the effect of Cluster 1 mutations on the PD bias of the  
352 CRM *lacZ* reporter transgene and the absence of an effect of the same mutations at the  
353 endogenous locus suggested the existence of additional regulatory inputs; as  
354 mentioned above, the *Ubx* locus itself is >100 kb, *abxFAIRE* is ~4 kb, and *abxF* is ~1.4  
355 kb, whereas *abxN* contains only 531 bp of *abx* sequence. Thus, the difference could  
356 suggest the involvement of multiple Ubx-Exd binding sites in Ubx-mediated proximal  
357 repression that are present in the greater *abx* region, but not within the *abxN* transgene.  
358 In fact, we can see some evidence of this even within the *abxN* transgenic CRM, itself.  
359 Even though the abrogation of binding to Cluster 1 resulted in the greatest amount of  
360 proximal de-repression, mutation of Cluster 2 also showed some effect (Figure 4C, C').



361 Thus, we sought to expand our window outside of *abxN* to search for additional  
362 predicted Ubx-Exd binding sites. Using *NRLB* (30), we identified the top twenty  
363 predicted Ubx-Exd binding sites within *abxFAIRE*, ranked by relative affinity (Figure 6A).  
364 Very few high affinity sites are present (colored in green, Figure 6A), and these binding  
365 sites exist near the border of the FAIRE peak, suggesting that they may not even be  
366 accessible *in vivo* (Figure 6A-Inset); the remaining predicted Ubx-Exd binding sites are  
367 low affinity sites, on par with those found within the smaller *abxN* fragment.

368

369 To streamline our mutagenesis efforts, we focused our attention on 1) mutating  
370 the small set of high affinity binding sites (green, Figure 6A), and 2) a larger set of low  
371 affinity binding sites all residing within *abxF* (red, Figure 6A). Mutations were made to  
372 abrogate Ubx-Exd binding within each of these sets independently and together,  
373 resulting in three mutant genotypes (Figure 6 Supplemental 1A). In order to generate  
374 *abxFAIRE* mutants at the endogenous locus we utilized our 4 kb replacement platform  
375 (Targeted Region<sup>4kb</sup>, Figure 5A, B) to perform RMCE. As above, we confirmed with an  
376 *abxFAIRE*<sup>WT</sup> replacement that the presence of the RMCE scars does not affect *Ubx*  
377 expression (Figure 6 Supplemental 1B, top panel).

378

379 A comparison of the PD bias in flies homozygous for the *abxFAIRE* replacement  
380 alleles revealed no defect in proximal repression upon mutation of either the set of high,  
381 low, or combined high and low binding sites (Figure 6B, quantification shown along with  
382 *abxN* replacements in B'). Thus, just as with the *abxN*-Cluster 1 mutants, mutation of up  
383 to fourteen binding sites (Figure 6 Supplemental 1A) within *abxFAIRE* was unable to

384 perturb the PD bias. This result was confirmed by generating homozygous *abxFAIRE*  
385 mutant mitotic clones in developing halteres; again, levels of proximal *Ubx* expression  
386 remained comparable to wildtype (Figure 6 Supplemental 1B).

387

388       Because not all low affinity binding sites within *abxFAIRE* were mutated –  
389 including those with relative affinities within the top 20 selected sites (Figure 6A, shown  
390 in black) and those below the relative affinity cutoff (not shown) – it remained possible  
391 that the lack of effect observed upon mutation of endogenous *abxFAIRE* was due to the  
392 presence of additional, unmutated binding sites. To address this, we first sought to  
393 understand the effect of additional *abx* mutations in a transgenic CRM reporter gene.  
394 We focused our attention on the set of low affinity *abxF* binding sites (red, Figure 6A)  
395 and returned to our *abxF-lacZ* reporter transgene to conduct an analysis of PD bias as a  
396 result of increasing mutation load on the ~1.4 kb *abxF* CRM. While mutation of the  
397 Cluster 1 or Cluster 2 binding sites alone did not result in proximal de-repression in this  
398 context, abrogation of binding to the set of all low affinity binding sites (red, Figure 6A)  
399 resulted in a slight, but statistically significant, de-repression and a concomitant  
400 reduction in the PD bias (Figure 6C, quantified in C'). The requirement for many  
401 mutations to begin to observe de-repression in the context of a longer *abx* fragment  
402 supports our hypothesis that multiple low affinity binding sites are necessary to achieve  
403 *Ubx* negative autoregulation. This also helps resolve the disparity between our results  
404 with the transgenic *abx-lacZ* reporters and at the endogenous *Ubx* locus. The presence  
405 of even more binding sites outside of the *abx* region could also contribute to PD bias

406 formation, masking the de-repression effect of mutations made on only a subset of  
407 binding sites.

408

409 To further assess the existence of binding sites outside of *abxN*, we replaced the  
410 endogenous ~4 kb *abxFAIRE* region with the much shorter (531 bp) *abxN* with and  
411 without Cluster 1 binding sites mutated, effectively deleting ~3.5 kb of *abxFAIRE* (Figure  
412 6 Supplemental Figure 2A, B). A reduction of the total number of potential Ubx-Exd  
413 binding sites within the *abxFAIRE* region through this strategy holds the potential to  
414 distinguish between two conclusions: (1) if an impact of mutating Cluster 1 on the PD  
415 bias is observed, it would argue for the sufficiency of binding sites within *abxFAIRE* for  
416 PD bias formation, or (2) if there is no impact of mutating Cluster 1, it is likely that  
417 additional Ubx-Exd binding sites outside of the *abxFAIRE* region are involved in PD bias  
418 formation. Two phenotypes are observable upon replacement of *abxFAIRE* with the  
419 shorter *abxN*. First, for both the WT *abxN* and Cluster 1<sup>kill</sup> replacements, large patches  
420 of tissue exhibit no *Ubx* expression (Figure 6 Supplemental Figure 2B). Thus,  
421 minimization of the *abx* CRM results in a seemingly stochastic loss of *Ubx* activation,  
422 underscoring the activating role of *abx*. While this phenotype makes it more challenging  
423 to address the effects of the *abxFAIRE-abxN* replacements on PD bias, in cells where  
424 *Ubx* expression was present, the PD bias remained intact even upon mutation of *abxN*  
425 Cluster 1 (Figure 6 Supplemental Figure 2B). This result confirms the likely involvement  
426 of binding sites elsewhere in the locus (outside of *abxFAIRE*) in *Ubx* negative  
427 autoregulation.

428

429 *Depletion of Ubx Protein de-represses proximal Ubx transcription at the native locus*

430

431 While we were able to establish the requirement for the cofactors, Hth and Exd,  
432 for proximal repression of the native *Ubx* locus through the generation of mutant mitotic  
433 clones (Figure 2B, D), evidence for the involvement of Ubx protein, itself, was restricted  
434 to the use of *abx-lacZ* transgenes (Figures 3 and 4) and the *lacZ<sup>HC166D</sup>* enhancer trap  
435 (Figure 1). To address the role of Ubx protein at the native *Ubx* locus, we made use of  
436 the nanobody-based deGradFP system designed to direct depletion of a GFP fusion  
437 protein using a genomically encoded and spatially restricted anti-GFP nanobody  
438 coupled to a ubiquitin E3 ligase that leads to proteasomal degradation of the targeted  
439 fusion protein (34,35). In parallel, we generated two *Ubx* knockin alleles through a two-  
440 step CRISPR/RMCE targeting strategy that replaced *Ubx exon 1* with either a *GFP<sup>Ubx</sup>*  
441 *exon 1* protein fusion (GFP<sup>Ubx</sup>) or a *GFP-t2a-Ubx Exon 1* allele (*GFP-t2a-Ubx*) that  
442 produces both GFP and Ubx protein in a 1:1 ratio (Figure 7 Supplemental 1). By  
443 combining the deGradFP system with these GFP<sup>Ubx</sup> alleles, along with smRNA FISH  
444 to assay Ubx transcription, we could directly interrogate whether a reduction of Ubx  
445 protein results in proximal de-repression of the endogenous *Ubx* locus.

446

447 Restriction of the expression of the deGradFP nanobody (Nslmb-vhhGFP), and  
448 thus depletion of GFP<sup>Ubx</sup>, was achieved both spatially using the Gal4/UAS system, and  
449 temporally by addition of a temperature-sensitive Gal80 repressor. For our purposes,  
450 degradation of Ubx was restricted to either the distal compartment (using *nubbin-Gal4*)  
451 or to the proximal compartment (using *teashirt-Gal4*), and allowed to occur for 24 hours

452 prior to dissection through a temperature shift from 18°C to 30°C (Figure 7A). smRNA  
453 FISH of homozygous *GFPUbx* haltere discs reveals the expected PD bias with proximal  
454 transcription levels lower than distal. This can also be observed by assessing native  
455 GFP fluorescence from the fusion gene (Figure 7B, top). Degradation of GFPUbx  
456 induced distally did not affect *Ubx* transcription as assayed by smRNA FISH (Figure 7B,  
457 middle left), further corroborated by GFP intensity in these discs. Distal GFPUbx protein  
458 levels decreased almost to proximal levels because, though transcription remains the  
459 same, the resulting protein is constantly degraded by the nanobody (Figure 7B middle  
460 right). In contrast, degradation of GFPUbx proximally resulted in increased proximal  
461 transcription as assayed by smRNA FISH (Figure 7B, left). Thus, consistent with our  
462 findings using transgenic *abx* reporters, *Ubx* is necessary for proximal repression at the  
463 endogenous locus; depletion of *Ubx* protein results in *Ubx* de-repression. This negative  
464 autoregulatory loop, though, appears restricted to the proximal compartment as loss of  
465 *Ubx* distally does not result in increased distal transcription levels. Finally, to ensure that  
466 these effects were due to the loss of *Ubx*, we repeated the same experiments on the  
467 *GFP-t2a-Ubx* allele. Here, degradation of GFP occurs independent of *Ubx* (Figure 7A);  
468 and, in fact, though clear loss of GFP intensity can be observed with expression of the  
469 deGradFP nanobody, no effect on transcription from the *GFP-t2a-Ubx* allele was seen  
470 either distally or proximally (Figure 7C).

471

## 472 **Discussion**

473

474           The proper regulation of gene expression levels is critical for proper cell function;  
475 this is particularly true for developmental genes that must be tightly regulated both in  
476 space and time. In this study, we have combined transgenic assays with genome  
477 engineering of a native CRM to characterize the mechanism of quantitative  
478 transcriptional tuning of a single developmental gene, *Ubx*. Using transgenic CRM  
479 reporter assays we have revealed a novel negative autoregulatory mechanism to  
480 partially repress proximal *Ubx* levels relative to distal, which functions, at least in part,  
481 through the intronic CRM, *abx*. *Ubx* in complex with its cofactors, Hth and Exd, binds a  
482 cluster of low affinity binding sites within *abx* to dampen transcription. In truncated *abx*  
483 transgenes, the number of binding sites that need to be mutated in order to observe de-  
484 repression increases as the length of the CRM – and thus the number of potential low  
485 affinity binding sites – increases. However, in our most truncated version (*abxN*), in  
486 which only two clusters of binding sites are predicted, mutation of a single cluster  
487 (Cluster 1) that abrogates *Ubx* binding is sufficient to observe de-repression; and  
488 mutation of the same cluster to a high affinity binding site enhances proximal repression  
489 – thus establishing a connection between the strength of *Ubx*-Exd binding to the CRM  
490 and the strength of repression. While previous reports demonstrated the utility of  
491 clusters of low affinity binding sites to balance specificity and robustness (32,36), which  
492 is likely at play here, low affinity binding sites may also make transcription more tunable  
493 by allowing CRMs to be more responsive to changes in local TF concentration (37).  
494 Further, in this case it appears that the affinity of the *Ubx*-Exd-Hth binding sites is tuned  
495 to create the right amount, and not too much, repression.  
496

497 By performing transgenic *abx* reporter assays and genome engineering of the  
498 native *abx* CRM in parallel, we were able to reveal disparities in the impact of binding  
499 site mutations in each context. While we established the role of Ubx (through targeted  
500 protein degradation) and Hth-Exd (through the use of genetic null alleles) in mediating  
501 proximal repression at the endogenous locus, mutation of 14 predicted binding sites  
502 within the native *abx* CRM did not result in de-repression of Ubx, despite having this  
503 effect in a transgenic reporter context. This disparity, along with our understanding of  
504 the involvement of multiple low affinity binding sites throughout the *abx* region, suggests  
505 a model in which proximal repression and the formation/maintenance of the PD bias  
506 relies on the contribution of sequence information beyond the *abx* region (Figure 7D).  
507 We focused in on a ~4 kb region within *abx* that both exhibits the highest signal in  
508 FAIRE accessibility assays, shows significant enrichment of Ubx and Hth binding, and is  
509 able to recapitulate the PD bias when paired with a reporter. Despite this, additional  
510 regions of chromatin accessibility and Ubx-Hth binding are observed within the locus,  
511 and the contribution they may play to PD bias formation cannot be ruled out (Figure 3A).  
512 Further, the UCR, as captured by a 35 kb region upstream of the TSS fused to *lacZ*  
513 (35UZ), also exhibits a PD bias – though only within the posterior domain where the  
514 UCR is active (13). Thus, it appears that generation of the PD bias through proximal  
515 repression is not established by a single regulatory element, but rather by modifying the  
516 activity of many (or all) regulatory elements within the locus.

517

518 This idea raises interesting questions regarding how proximal repression is  
519 achieved upon binding of Ubx to *abx*. Given our evidence that *abx* mediates both

520 activation of Ubx transcription (both proximally and distally) and repression of Ubx  
521 transcription (proximally), it becomes interesting to ask if Ubx-mediated repression in  
522 this context is a dampening of the inherent activating potential of *abx*. This becomes  
523 particularly pertinent when considering the absence of Ubx repression in the distal hinge  
524 even though Ubx, Hth, and Exd are present (Figure 2A). The contribution of other  
525 factors (either proximally or distally) could potentially modulate the repressive effect of  
526 Ubx at *abx*.

527

### 528 ***Author Contributions***

529

530 All authors contributed to the design of this study; VR, RKD, RL, RV conducted  
531 experiments. RKD, VR, and RSM wrote the manuscript.

532

### 533 ***Acknowledgements***

534

535 The authors thank members of the Mann lab for comments and suggestions throughout  
536 this study and Chaitanya Rastogi and Harmen Bussemaker for help with binding site  
537 analyses.

538

### 539 ***Methods***

540

### 541 ***Fly Strains***



542 All wildtype strains used are *yw*. Mutant alleles used are as follows: *exd*<sup>1</sup>, *exd*<sup>2</sup>, *hth*<sup>P2</sup>,  
543 *hth*<sup>100-1</sup>, *Ubx*<sup>9-22</sup>, *Dcr*<sup>2</sup>. UAS-*ExdRNAi* was obtained from the Vienna Stock Center  
544 (VDRC), and UAS-*UbxRNAi* was generated in our lab using the following primer sets –  
545 Ubx-F-NheI: GATCGCTAGCAACTCGTACTTTGAACAGGCC; Ubx-F-AvrII:  
546 GATCCCTAGGAAGCTCGTACTTTGAACAGGCC; Ubx-R-XbaI:  
547 GATCTCTAGAGCTGACACTCACATTACCGC; Ubx-R-EcoRI:  
548 GATCGAATTCGCTGACACTCACATTACCGC. *Ubx-lacZ*<sup>HC166D</sup> (also referred to as *Ubx-*  
549 *lacZ*<sup>166</sup> (16)) was a gift from Welcome Bender and is described in Bender *et al.* 2000  
550 (23). UAS-GFPdegrade flies (UAS-NSImb-vhhGFP4) are from Bloomington (34). The  
551 following CRISPR alleles (described below) were made for and used in this study:  
552 Targeted Region<sup>2kb-ubiDsRed</sup> Replacement Platform, *abxN*<sup>WT</sup>, *abxN*<sup>Cluster1Kill</sup>, *abxN*<sup>Cluster1Hi</sup>,  
553 Targeted Region<sup>4kb-ubiDsRed</sup> Replacement Platform, *abxFAIRE*<sup>WT</sup>,  $\Delta$ *abxFAIRE* (which is:  
554 *abxFAIRE*<sup>MCS</sup>), *abxFAIRE*<sup>Low-Mutant</sup>, *abxFAIRE*<sup>High-Mutant</sup>, , *abxFAIRE*<sup>Low+High-Mutant</sup>  
555 *abxFAIRE-abxN*<sup>WTreplace</sup>, *abxFAIRE-abxN*<sup>Cluster1Killreplace</sup>, *UbxExon1*<sup>P3RFP</sup> Replacement  
556 Platform, *UbxExon1*<sup>WT</sup>, *GFPUbx* Fusion, *GFP-t2a-Ubx*.

557

### 558 **CRISPR Targeting**

559

560 Two regions within *abx* and one region encompassing *Ubx* Exon1 were targeted with  
561 CRISPR/Cas9. For each targeting event, two gRNAs were designed flanking the region  
562 of interest. gRNA sequences for each of the regions are as follows – *abx-Targeted*  
563 *Region*<sup>2kb</sup>: GAGATGCTTTTGAATTCTCG and GGCAGATCGGATTGGATCTT; *abx-*  
564 *Targeted Region*<sup>4kb</sup>: GGCTTTGCAACTAATTGAAA and

565 GTAAATGTTGGCTATTCAAAA; *Ubx* Exon1: GAATTCGAAGAAAATTAG and  
566 GTAAGACATATGAAAGC. gRNAs were cloned into the pCFD4 dual gRNA vector  
567 (<http://www.crisprflydesign.org/>, Port *et al.* 2014 (38)). Homemade donor vectors were  
568 made containing either a ubiDsRED or P3-RFP fluorescent selection marker flanked by  
569 inverted PhiC31 attP recognition sequences – the ubiDsRED cassette contains a full  
570 attP sequence  
571 (GTACTGACGGACACACCGAAGCCCCGGCGGCAACCCTCAGCGGATGCCCCGGG  
572 GCTTCACGTTTTCCAGGTCAGAAGCGGTTTTCGGGAGTAGTGCCCCAACTGGGG  
573 TAACCTTTGAGTTCTCTCAGTTGGGGGCGTAGGGTCGCCGACATGACACAAGGGG  
574 TTGTGACCGGGGTGGACACGTACGCGGGTGCTTACGACCGTCAGTCGCGCGAGC  
575 GCGA), whereas the P3-RFP cassette contains a minimal attP sequence  
576 (CCCCAACTGGGGTAACCTTTGAGTTCTCTCAGTTGGGGG) from Voutev *et al.* 2018  
577 (39). ~1.5 kb homology arms were cloned on either side of the inverted attP sites.  
578 Primers used to clone the homology arms are as follows: *abx-Targeted Region*<sup>2kb</sup>: (Left  
579 Arm) GCCAGAAGCTGCAAATTCAAG and CTTTGGGTTCTGTTCCACAGC, (Right  
580 Arm) GAATTCAAAAGCATCTCCGCATAAAG and GCCAACCGCAGACTGTGCGA;  
581 *abx-Targeted Region*<sup>4kb</sup>: (Left Arm) GATGTAGGCCATGGTTTTCGGC and  
582 TGAATAGCCAACATTTACTGACTCG, (Right Arm)  
583 AAACGGTAAACTTGAGATTTTCTTATT and CGGAGAATCCGTATGAATCG; *Ubx*  
584 *Exon1*: (Left Arm) GCTCAACTGTAGTTTTCTGTTTCG and  
585 ATTTTCTTCGAATTCTTATATGCTAT, (Right Arm) AGCAGGCAGAACAGACCTT and  
586 CTCGCAGAGATTGTCTGACAC. The gRNA template (pCFD4) and donor template  
587 were injected into a germline-expressing Cas9 strain (nanos-Cas9, Kondo *et al.* 2013

588 (40)) at a concentration of 250 ng/μL and 500 ng/μL, respectively. Selection of positive  
589 CRISPR events was done by screening for the presence of ubiDsRED or P3-RFP.  
590 Positive fly lines were validated by PCR and Southern Blot analysis.

591

### 592 ***Recombinase Mediated Cassette Exchange (RMCE)***

593

594 PhiC31-mediated RMCE was used to replace the ubiDsRED/P3-RFP selection markers  
595 inserted using CRISPR/Cas9 into *abx/Ubx Exon1*. A homemade vector was used,  
596 containing inverted PhiC31 attB recognition sequences  
597 (CGGGTGCCAGGGCGTGCCCTTGGGCTCCCCGGGCGCGTAC) flanking a multiple  
598 cloning site for insertion of sequences used for replacement alleles. Replacement of  
599 wildtype sequence from *abx-Targeted Region<sup>2kb</sup>*, *abx-Targeted Region<sup>4kb</sup>*, and *Ubx*  
600 Exon1 was performed by amplifying regions of interest from the yw genome. The  
601 following primers were used – *abx-Targeted Region<sup>2kb</sup>*: ATCCAATCCGATCTGCCAG  
602 and TCGAGGAGTGAGTAAGAGATTGATAAAG; *abx-Targeted Region<sup>4kb</sup>*:  
603 AACCGGGAGGCTTTTGCTG and CAATTAGTTGCAAAGCCGTTTTTC; *Ubx Exon 1*:  
604 TAGAGGTTGTATTGTTTTATTAATAAAAAACCTATTG and  
605 TTCATATGTCTTACATTACAAGTTGTTATCTGTTTTTCC. Mutations of replacement  
606 regions were made either by site directed mutagenesis or through synthesis and ligation  
607 of mutated restriction fragments within the region of interest. In the generation of *abx-*  
608 *Targeted Region<sup>4kb</sup>* mutant replacements, the ~4 kb fragment with mutations was  
609 stitched together from synthesizing restriction fragments based on reference sequence  
610 with engineered mutations. In doing this, additional natural variants (SNPs, small indels)

611 between the reference strain and our wildtype strain (yw) were introduced into the  
612 *abxFAIRE*<sup>LowAffinityMut</sup> and *abxFAIRE*<sup>LowandHighMut</sup>, and thus differ from the wildtype  
613 *abxFAIRE*<sup>WT</sup> replacement allele in these additional locations. These natural variants do  
614 not reside within predicted Ubx/Exd binding sites, do not create new predicted Ubx/Exd  
615 binding sites, nor do our results show that they have an effect on PD bias formation.  
616 The *abxFAIRE* deletion allele was generated by using an attB donor plasmid containing  
617 a multiple cloning site  
618 (gaagcttctaggaggcctagatctgcgccgctaattaaacgcgtgaatggcgcgccgctagccatatgggtaccg  
619 gatcc). The replacement of *abxFAIRE* with *abxN* was done using the following primers:  
620 GAACACAAAGGAGTCTGGTG and AACGTCGGAGGATGTAGG. The GFPUbx fusion  
621 and GFP-t2a-Ubx replacement alleles were cloned using overlap PCR and inserted at  
622 the transcription start site of *Ubx Exon 1*. The GFPUbx fusion contained the linker,  
623 GSGSGS; the GFP-t2a-Ubx allele contained the t2a sequence,  
624 ggttctggagagggccgcgccagcctgctgacctgcgccgatgtggaggagaaccccgggccc. Replacement  
625 donor plasmids were injected into flies with the attP platform cassette either at *abx* or at  
626 *Ubx Exon 1*. The necessary recombinase enzyme, PhiC31, was either injected as  
627 plasmid along with the donor cassette (*abx* replacements) or was expressed from a  
628 genomic insertion on the X chromosome of nanos-PhiC31 (*Ubx Exon 1* replacements).  
629 Progeny from injected flies were screened for the loss of the fluorescent selection  
630 marker (UbiDsRED, P3-RFP). Because the attP/attB reaction does not provide  
631 directionality, replacements can be inserted in the forward or reverse direction.  
632 Southern blot was performed to ensure the correct directionality of the replacement.  
633

634 **Antibodies**

635

636 Antibodies used are as follows – anti-Ubx (mouse, 1:10 FP3.38 from Developmental  
637 Studies Hybridoma Bank (DSHB) in supernatant or ascites form); anti- $\beta$ -gal (Rabbit,  
638 1:5000, MP Biochemicals 559762); anti-Hth<sup>HD</sup> (guinea pig, 1:500, Noro and Mann 2006  
639 (26)); anti-Hth (guinea pig, 1: 5000, Ryoo and Mann 1999 (41)); anti-Exd (rabbit, Mann  
640 and Abu-Shaar 1996 (42)); where GFP signal is shown, native GFP fluorescence was  
641 acquired.

642

643 **FAIRE and ChIP-CHIP Data Accession**

644

645 FAIRE data shown was from McKay *et al.* (29), and downloaded from NCBI GEO  
646 database with accession number: GSE38727. ChIP data for Ubx and Hth was obtained  
647 from Slattery *et al.* (28), and downloaded from NCBI GEO database with accession  
648 number: GSE26793.

649

650 **Immunostaining of Imaginal Discs**

651

652 Wandering third instar larvae were collected and dissected in PBS to invert the head  
653 region and expose attached imaginal discs to solution. Inverted heads were fixed in Fix  
654 Solution (PBS/4% Paraformaldehyde/.1% TritonX/.1% Sodium Deoxycholate) for 25  
655 minutes at RT. Fix solution was removed and replaced with Staining Solution (PBS/.3%  
656 TritonX/1% BSA). Inverted heads were washed 2X with Staining Solution for 20 minutes

657 at RT and stained overnight with desired antibody in Staining Solution at 4C. The  
658 following day antibody solution was removed and inverted heads washed 4X with  
659 Staining Solution followed by a 1.5hr incubation with secondary antibody and DAPI  
660 (1:1000) in Staining Solution at RT. This was followed by two washes with Staining  
661 Solution, dissection of discs from the inverted heads in PBS and mounting of the discs  
662 in Vectashield. Imaging of discs was conducted on the following microscopes: Zeiss  
663 Apotome.2 Microscope, Leica SP5 Confocal Microscope, and Zeiss LSM 800 Confocal  
664 Microscope.

665

#### 666 ***Calculation of Distal/Proximal Ratio***

667

668 All analysis was done in Fiji/ImageJ. Confocal Z-stacks of discs were imported into Fiji  
669 and slices near the edge of the stack that contained peripodial membrane were  
670 manually removed. All pixels surrounding the haltere disc of interest were cleared by  
671 drawing an ROI around the disc itself. ROIs for the distal compartment and proximal  
672 compartment were drawn based on a single Z-slice in which the distal pouch was  
673 clearly demarcated (using either the antibody stain of interest (Ubx/LacZ) or DAPI).  
674 These ROIs were propagated to all slices of the image and the average intensity of the  
675 stain of interest was acquired, excluding black pixels. For each disc, the mean of these  
676 single-slice average intensities was computed for the whole disc, distal compartment,  
677 and proximal compartment. Multiple discs were analyzed to produce the scatter plots  
678 shown. Each point is representative of a single disc. A one-way ANOVA analysis

679 followed by Tukey's multiple comparisons test with  $\alpha = .05$  was used for statistical  
680 analysis. This process is depicted in a schematic in Supplemental Figure 1.

681

### 682 ***Imaging of Adult Haltere Structure***

683

684 Whole adult flies were submerged in 70% ethanol, followed by three washes in  
685 PBS/.3% TritonX. The head and abdomen were removed, leaving the thorax with  
686 appendages attached. Thoraces were fixed overnight at 4C in PBS/4%  
687 Paraformaldehyde. The following day, thoraces were washed 5X with PBS/.3% TritonX,  
688 followed by dissection and mounting of halteres in Vectashield. Imaging was conducted  
689 on a Leica SP5 confocal microscope, acquiring autofluorescence of the cuticle with the  
690 488 laser. Images shown are MAX projections of the stacks acquired.

691

### 692 ***Generation of lacZ Reporter Constructs***

693

694 All CRM lacZ reporter constructs were generated by cloning the regulatory DNA of  
695 interest (*abxN*, *abxF*) into pRVV54-lacZ (43) using the NotI and HindIII restriction  
696 enzyme sites. Primers (5' to 3') used to amplify each regulatory region are as follows –  
697 *abxN*: GAACACAAAGGAGTCTGGTG and AACGTCGGAGGATGTAGG; *abxF*:  
698 GAACACAAAGGAGTCTGGTGAG and GTTAAGCATTTTGGGTGCGAG. All lacZ  
699 reporter constructs were inserted into the attp40 landing site on chr2. Mutations were  
700 made either through site-directed mutagenesis or through synthesis of mutated

701 restriction fragments within the regulatory region of interest, which were then ligated  
702 back into the pRVV54-lacZ backbone.

703

#### 704 ***NRLB Binding Site Prediction***

705

706 Binding sites for Exd/UbxIVa were predicted using the NRLBtools package in R (30).

707

#### 708 ***Generation of RNAi Flip-out Clones***

709

710 Flip-out clones were generated by crossing *act<y<Gal4, UAS-GFP* to different *hs-flp*;

711 *UAS* lines and heat-shocking larvae for between 8-10 minutes at 37C.

712

#### 713 ***Generation of Mitotic Clones***

714

715 Mutant alleles of interest were recombined with standard FRT lines. Flies with mutant

716 recombined alleles were crossed to either FRT ubiGFP or ubiDsRED (to mark the

717 clones) and progeny of this cross were heatshocked at 37C for 40min-1hr 48 hours after

718 egg laying (AEL). Wandering third instar larvae were collected 72 hours after heatshock,

719 dissected, and subjected to the immunostain protocol as described.

720

#### 721 ***ChIP-qPCR***

722



723 Wandering third instar larvae from two different genotypes (*abxN WT-lacZ* and *abxN*  
724 *Cluster 1<sup>kill</sup>-lacZ*) were dissected and haltere imaginal discs were collected in PBS on  
725 ice. Discs were fixed with 1.8% formaldehyde, crosslinked chromatin was sonicated,  
726 and chromatin preparation and immunoprecipitation was performed as described in  
727 Estella *et al.* 2008 (44). The IP was done with rabbit anti-Ubx (Ubx1, generated by  
728 modENCODE) at a final concentration of 1.5 µg/mL for each IP. Rabbit IgG (Sigma)  
729 was used for the control IP. The following primer pairs were used for qPCR –  
730 Endogenous *abx*: TGGAGCTCCAAATGAAACGC and CGCTCAACATTGTTAGTGGC;  
731 Transgenic *abxN*: CAGTGCTGGCTGCATTTGCT and ACAACTGATGCTCTCAGCCA;  
732 Intergenic Control: CCGAACATGAGAGATGGAAAA and  
733 AAAGTGCCGACAATGCAGTTA. qPCR was done on an Applied Biosystems 7300  
734 machine and calculations were done using the 2- $\Delta\Delta$ Ct method in MS Excel. IPs were  
735 done in triplicate.

736

### 737 ***Protein Purification and Electrophoretic Mobility Shift Assays (EMSAs)***

738

739 Ubx protein was His-tagged and purified from *E. coli* (BL21 or BL21pLysS; Agilent) 4  
740 hours of induction with isopropyl-B-D-thiogalactopyranoside (IPTG) using Co-  
741 chromatography. Exd (in pET9a) and Hth<sup>HM</sup> (in pET21b) were co-expressed and co-  
742 purified, through the His-tag attached to Hth<sup>HM</sup>, in *E. coli* (BL21) in the same way as Ubx  
743 recombinant protein and used as a complex for all EMSAs. Protein concentrations were  
744 determined by the Bradford assay and then confirmed by SDS/PAGE and Blue  
745 Coomassie analysis (SimplyBlue SafeStain, Invitrogen). EMSAs were carried out as

746 previously described ((45)). Ubx1a was used at 250 ng/lane (high concentration) and  
747 200 ng/lane (low concentration) and Exd/HthHM was used at 150 ng/lane. Sequences  
748 for probes used are as follows – *abxWT*:

749 CCTCGTCCCACAGCTcgaatatattttataacccggagcaaatgcagcca; *abxCluster1<sup>Kill</sup>*:  
750 CCTCGTCCCACAGCTcgaatcccctccccacccggagcaaatgcagcca. Uppercase is linker  
751 sequence. DNA binding was observed using phosphoimaging as detected by a  
752 Typhoon Scanner (Amersham).

753

#### 754 ***smRNA FISH***

755

756 A probe library containing 48 20-nt Stellaris FISH probes was designed to target the first  
757 2 kb of Ubx Intron 1. Libraries were ordered from Biosearch Technologies and labelled  
758 with Quasar 670. Wandering third instar larvae were collected and dissected in PBS to  
759 invert heads and expose discs to solution. Inverted heads were washed in PBSM  
760 (PBS/5mM MgCl<sub>2</sub>) 1X at RT, followed by fixation in PBSM/4% PFA for 10 min at RT.  
761 Discs were permeabilized with PBS/.5% TritonX for 10 min at RT and washed once with  
762 PBSM for 10 min at RT. Inverted heads were washed 1X with Pre-Hyb (10% deionized  
763 formamide in 2X SSC) for 10 min at RT prior to hybridization. Hybridization was  
764 performed overnight in a thermoshaker at 37C (~600RPM) covered in foil. Hybridization  
765 buffer contains: 2X SSC, .2 mg/mL BSA, 50% Dextran Sulfate, 10% deionized  
766 formamide, 50 µg/mL *E. coli* tRNA, 50 µg/mL salmon sperm ssDNA, and 125 nM Ubx  
767 Intron Probe. 100 µL of hybridization buffer was used for each sample. The following  
768 day, hybridization buffer was removed and heads were washed with Pre-Hyb buffer for

769 20 minutes at 37C and 20 min at RT. Inverted heads were washed with PBS for 10 min  
770 at RT, stained with DAPI (PBS/DAPI (1:1000 dilution) for 30 min at RT and  
771 resuspended in PBS. Discs were dissected from inverted heads in PBS/1%BSA and  
772 mounted in Vectashield prior to imaging.

773

#### 774 ***GFP Degrade Assay***

775

776 deGRADFP flies, UAS-NSlmb-vhhGFP4, were obtained from Caussinus *et al.* 2011 (34)  
777 and paired with tubGal80ts, and either nubbin (nub)-Gal4 or teashirt (tsh)-Gal4. Flies  
778 were crossed to GFPUbx fusion or GFP-t2a-Ubx knockin flies. Progeny were kept at  
779 18C (Gal80 inactive) until early third instar stage and then shifted to 30C for 24 hours  
780 prior to dissection. Wandering third instar larvae were collected, dissected, and  
781 subjected to smRNA FISH analysis. Genotypes are as follows: “No Degrade:” yw;  
782 gal80ts, UAS-GFPdegrade, gal80ts/UAS-GFPdegrade, gal80ts; GFPUbx (or GFP-t2a-  
783 Ubx)/GFPUbx (or GFP-t2a-Ubx); “Distal Degrade:” yw; nubGal4/gal80ts, UAS-  
784 GFPdegrade; GFPUbx (or GFP-t2a-Ubx)/ GFPUbx (or GFP-t2a-Ubx); “Proximal  
785 Degrade:” yw; tshGal4/gal80ts, UAS-GFPdegrade; GFPUbx (or GFP-t2a-Ubx)/ GFPUbx  
786 (or GFP-t2a-Ubx).

787

788

#### 789 ***Figure Captions***

790

791 **Figure 1. Proximal/Distal Expression Bias of *Ubx* is Established at the Level of Transcription.**

792 **(A)** (Left) A schematic of the 3<sup>rd</sup> Instar haltere imaginal disc, denoting regions of high versus  
793 low *Ubx* expression along with regions fated to become the notum (yellow), the proximal  
794 hinge (red), the distal hinge (green) and the pouch (blue). Domains of expression of key  
795 proximal (*teashirt* (*tsh*), *homothorax* (*hth*)) and distal (*nubbin* (*nub*)) specifying genes are  
796 shown. (Right) A confocal image (MAX projection) of an adult haltere. Dorsal view is shown.  
797 Structures along the proximal-distal axis are specified. **(B)** *Ubx* immunostain (along with  
798 DAPI nuclear stain) of a 3<sup>rd</sup> Instar haltere imaginal disc showing proximal-distal expression  
799 bias. Haltere disc is outlined in yellow. MAX projection of 4 slices shown. **(B')** Quantification  
800 of average *Ubx* immunostain intensity in the whole disc (“Disc”), proximal compartment,  
801 and Distal compartment. Each colored point represents a single disc (N=11). Dotted line  
802 represents the mean for each compartment. Reported D/P ratio is computed by dividing the  
803 mean distal intensity by the mean proximal intensity. **(C)** Single-molecule RNA FISH  
804 (smRNA FISH) against the first intron of *Ubx* (along with DAPI nuclear stain) showing  
805 proximal-distal bias at the level of transcription. MAX projection of all slices shown. **(D)**  
806 (Left) LacZ immunostain driven by the enhancer trap insertion, *lacZ<sup>HC166D</sup>*. (Right) LacZ  
807 immunostain driven by *lacZ<sup>HC166D</sup>* upon generation of *UbxRNAi* clones. *Ubx* and GFP  
808 immunostains are also shown. GFP+ tissue marks cells expressing *UbxRNAi*. All scale bars  
809 shown are 50 micron in size.

810

811

812 **Figure 2. Proximal autorepression of *Ubx* Relies on Hox cofactors Hth/Exd.** (A) Immunostain  
813 of *Ubx* (Left) and Hth (Middle), along with a merge of the two (Right) in 3<sup>rd</sup> instar haltere  
814 imaginal discs. The distal hinge is marked with an asterisk to denote a *Ubx*-high region that  
815 also expresses *hth*. (B) *Ubx* immunostain in haltere discs in which *hth* null clones (*hth*<sup>P2</sup>)  
816 have been induced. Hth and GFP immunostains are also shown. Clones are Hth- and GFP-  
817 negative. Yellow arrows point to the clone. (C) *Ubx* immunostain in haltere discs in which  
818 Hth<sup>HM</sup>-only clones (*hth*<sup>100-1</sup>), lacking the C-terminal homeodomain) have been induced. An  
819 immunostain for the C-terminus of Hth (Hth<sup>HD</sup>) and GFP are shown. Clones are Hth<sup>HD</sup>- and  
820 GFP-negative. (D) *Ubx* Immunostain in haltere discs in which *exd* null clones (*exd*<sup>I</sup>) have  
821 been induced. An Exd and GFP immunostain are also shown. Clones are Exd- and GFP-  
822 negative. Yellow arrows point to clones. (E) Exd immunostain in haltere discs in which *Ubx*  
823 null clones (*Ubx*<sup>9-22</sup>) have been induced. *Ubx* and GFP immunostains are also shown. Clones  
824 are *Ubx*- and GFP-negative, and outlined in yellow. (F) Hth immunostain in haltere discs in  
825 which *Ubx*-null clones (*Ubx*<sup>9-22</sup>) have been induced. A *Ubx* and GFP immunostain are also  
826 shown. Clones are *Ubx*- and GFP-negative, and outlined in yellow. All scale bars shown are  
827 50 micron in size.

828

829 **Figure 3. A *Ubx*-regulated Module within the Intronic *abx* CRM Mediates autorepression.**

830 (A) A screenshot of the *Ubx* locus within the Integrative Genomics Viewer (IGV) is shown.  
831 FAIRE accessibility peaks from McKay *et al.* ((29)) are shown for 3<sup>rd</sup> instar wing and haltere  
832 imaginal discs (top two tracks). *Ubx* and Hth ChIP-chip in 3<sup>rd</sup> instar haltere discs from

833 Slattery *et al.* ((28)) are shown (bottom two tracks). The intronic *anterobithorax* (*abx*)  
834 regulatory region is boxed. The location of two *abx* fragments that drive reporter expression  
835 (*abx3.2*, *abx6.8*) are shown in red, along with the annotated location of the *abx* Polycomb  
836 repressive element (PRE). Regions of interest (*abxN*, *abxF*, *abxFAIRE*) in this paper are  
837 shown beneath the annotated *Ubx* gene. **(B)** Ubx Immunostain in haltere discs containing  
838  $\Delta abxFAIRE$  clones. A GFP immunostain, in addition to a merge of GFP/Ubx, is also shown.  
839 Clones are marked by yellow arrows and outlined in yellow. **(C)** LacZ immunostain in 3<sup>rd</sup>  
840 instar imaginal discs expressing *lacZ* from an *abxF-lacZ* transgene. A wing, T3 leg and haltere  
841 are shown. A Ubx immunostain, in addition to a merge of LacZ/Ubx, is also shown. **(D)** LacZ  
842 immunostain in *abxF-lacZ* transgenic haltere discs in which *hth* null clones (*hth<sup>P2</sup>*) have  
843 been induced. GFP and Hth immunostains are also shown. Clones are GFP- and Hth-  
844 negative, and marked with a yellow arrow. **(E)** LacZ immunostain in *abxF-lacZ* transgenic  
845 haltere discs in which *exd* null clones (*exd<sup>I</sup>*) have been induced. GFP and Exd immunostains  
846 are also shown. Clones are GFP- and Hth-negative, and marked with a yellow arrow. **(F)**  
847 LacZ immunostain in *abxF-lacZ* transgenic haltere discs in which Hth<sup>HM</sup>-only clones (*hth<sup>100-</sup>*  
848 <sup>I</sup>, lacking the C-terminal homeodomain) have been induced. An immunostain for the C-  
849 terminus of Hth (Hth<sup>HD</sup>) and GFP are also shown. Clones are Hth<sup>HD</sup>- and GFP-negative, and  
850 outlined in yellow. **(G)** LacZ immunostain in *abxF-lacZ* transgenic haltere discs in which  
851 *Ubx* null clones (*Ubx<sup>9-22</sup>*) have been induced. A GFP immunostain, in addition to a merge of  
852 GFP/LacZ, is shown. Clones are GFP-negative and marked with a yellow arrow.  
853

854 **Figure 4. Ubx Directly Binds *abxN* to Autorepress in the Proximal Compartment. (A)** LacZ  
855 immunostain in *abxN-lacZ* haltere discs. A DAPI nuclear stain and a merge of LacZ/DAPI  
856 are shown. **(B)** *NRLB* predicted Ubx-Exd binding sites within the 531 bp *abxN*, along with  
857 their relative affinities. Strandedness of the predicted binding sites is depicted by color: black  
858 bars above the axis denote the start of a site in the forward direction and red bars below the  
859 axis denote start of a site in the reverse direction. The boxed region is focused on in B'. **(B')**  
860 49 bp zoomed in region from **B**. Binding sites are divided into Cluster 1 and Cluster 2. **(B'')**  
861 Schematic of mutations of Cluster 1 and 2 made in this paper. Cluster 1 was mutated to  
862 abrogate Ubx/Exd binding (Kill) and enhancer Ubx/Exd binding (Hi). Cluster 2 was mutated  
863 to abrogate Ubx/Exd binding (Kill). **(C)** LacZ immunostains in *abxN-lacZ* transgenic haltere  
864 discs. Exemplary images are shown for discs transgenic for wildtype and mutant forms of the  
865 transgenic *abxN*. **(C')** Quantification of the Distal/Proximal ratio in discs described in **C**.  
866 Colors indicate discs from a single experiment. Dotted red bar signifies the mean value.  
867 Significance values are derived from one-way ANOVA analysis followed by Tukey's multiple  
868 comparisons test with alpha = .05. Multiplicity adjusted p-values for each level of significance  
869 are: <.0001 for \*\*\*\*, .0005 for \*\*\*, and .0143 for \*. All scale bars shown are 50 micron in size.

870

871 **Figure 5. Mutation of *abxN* at the Native Locus is not Sufficient to Alter the Proximal-Distal**  
872 **Bias. (A)** (Top) IGV Genome Browser Snapshot displaying FAIRE accessibility peaks in the  
873 wing and haltere (from McKay *et al.* (29)), and Ubx and Hth ChIP-chip peaks in the haltere  
874 (from Slattery *et al.* (28)). The bottom conservation track was downloaded from UCSC

875 Genome Browser and denotes the evolutionary conservation of *D. melanogaster* sequence  
876 with twelve other *Drosophila* species, mosquito, honeybee and red flour beetle. Regions  
877 devoid of red lack conservation. (Bottom) Regions targeted with CRISPR/Cas9. Black bars are  
878 the regions that were targeted for deletion and/or replacement. Yellow triangles denote  
879 regions of low conservation that were targeted by the Cas9/gRNA complex. These are also  
880 the points of insertion of the integrase recognition sequence (*attP*). (B) A schematic of the  
881 two-step CRM replacement strategy. gRNA sites were chosen in non-conserved regions  
882 surrounding the *abx* sequence of interest. A dual-gRNA expressing plasmid was injected  
883 along with a donor cassette containing an attP-flanked fluorescent selection marker (*ubi-*  
884 *dsRED*) into *nanos-Cas9* flies. The resulting “*abx* Replacement Platform” serves as a means to  
885 delete or insert modified versions of *abx* using PhiC31-based RMCE. (C) Ubx immunostain in  
886 haltere discs homozygous for *abxN* replacement alleles. WT and Cluster 1 mutants are shown  
887 alongside a *yw* control. (C') (Top) A schematic of the Targeted Region<sup>2kb</sup> replacement  
888 boundaries for discs shown in C. (Bottom) Quantification of the Distal/Proximal ratio in discs  
889 from C. Each point is an individual disc. Points are color-coded by experiment. Dotted red  
890 line signifies mean value. Significance was tested using a one-way ANOVA analysis followed  
891 by Tukey’s multiple comparisons test with alpha = .05. All scale bars shown are 50 micron in  
892 size.

893

894 **Figure 6. Multiple Low Affinity Ubx/Exd Binding Sites are Required for PD Bias Formation.**

895 (A) The top twenty *NRLB* predicted Ubx-Exd binding sites within the 4057 bp *abxFAIRE*,



896 along with their relative affinities. Sites are segregated into high affinity (green), low affinity  
897 (red), both of which are mutated. Sites in black were not mutated. Locations of *abxN* and  
898 *abxF* are boxed. The *inset* places the mutated sites in the context of haltere *abx* accessibility.  
899 **(B)** Ubx immunostain in haltere discs homozygous for *abxFAIRE* replacement alleles. WT,  
900 Low Affinity Mutants, High Affinity Mutants, and the combination are shown. **(B')** (Top) A  
901 schematic of the Targeted Region<sup>4kb</sup> replacement boundaries for discs shown in **B**, along with  
902 a Ubx immunostain in haltere discs from *yw* flies for control. (Bottom) Quantification of the  
903 Distal/Proximal (D/P) ratio in discs from **B** combined with *abxN* replacements from Figure 5.  
904 Each point is an individual disc. Points are color-coded by experiment. Dotted red line  
905 signifies mean value for each genotype. Significant differences between each of the  
906 replacement alleles was tested using one-way ANOVA analysis followed by Tukey's multiple  
907 comparisons test with alpha = .05. All scale bars shown are 50 micron in size. **(C)** LacZ  
908 immunostain in haltere discs with a wildtype or mutant *abxF-lacZ* reporter transgene.  
909 Haltere discs are outlined in yellow. **(C')** Quantification of Distal/Proximal ratios in *abxF-*  
910 *lacZ* transgenic discs. Each point denotes an individual disc. Dotted red line denotes mean  
911 value for each genotype. Significance values are derived from one-way ANOVA analysis  
912 followed by Tukey's multiple comparisons test with alpha = .05. Multiplicity adjusted p-  
913 values for each level of significance are: <.0001 for \*\*\*\*.

914

915 **Figure 7. Depletion of Ubx Protein Derepresses Proximal *Ubx* Transcription at the Native**

916 **Locus.** (A) Schematic of the GFP-degrade system used. A *GFP<sup>Ubx</sup>* fusion and a *GFP-t2a-Ubx*

917 knockin were generated by CRISPR. These *Ubx* alleles were coupled with a UAS-driven  
918 nanobody-based GFP degrade system (from (34,35), compartment restricted Gal4 drivers,  
919 and a temperature-sensitive Gal80 transgene to restrict GFP degradation to a short window.  
920 Larvae were shifted from 18°C (Gal80 active) to 30°C (Gal80 inactive) to allow for GFP  
921 degradation 24hr prior to dissection. **(B)** (Left) smRNA FISH against the first intron of *Ubx* in  
922 *GFP<sup>Ubx</sup>* fusion knockin haltere discs. (Middle) Cropped image of smRNA FISH from left.  
923 (Right) Acquisition of GFP fluorescence. “No Degrade” signifies the absence of a Gal4 to  
924 drive the degrade system. “Distal Degrade” denotes the use of *nubbin-Gal4* (*nub-Gal4*), and  
925 “Proximal Degrade” denotes the use of *teashirt-Gal4* (*tsh-Gal4*). **(C)** The same experiment as  
926 in **B** for the *GFP-t2a-Ubx* allele. **(D)** A model of *Ubx* negative autoregulation in the proximal  
927 haltere. Multiple low affinity *Ubx*-*Exd* binding sites within *abx* are necessary for proximal  
928 repression, but we cannot rule out the involvement of additional sequence juxtaposed to *abx*  
929 or elsewhere in the gene. Because *abx* is necessary for the activation of *Ubx* expression (both  
930 distally and proximally), we suggest the possibility that the proximal repression effect results  
931 from a modification of this inherent activating role. All scale bars are 50 micron in size.

932

933

934

## 935 **References**

936

- 937 1. Driever W, Nüsslein-Volhard C. The bicoid protein determines position in the  
938 *Drosophila* embryo in a concentration-dependent manner. *Cell*. 1988 Jul

- 939 1;54(1):95–104.
- 940 2. Grueber WB, Jan LY, Jan Y-N. Different levels of the homeodomain protein cut  
941 regulate distinct dendrite branching patterns of *Drosophila* multidendritic neurons.  
942 *Cell*. 2003 Mar 21;112(6):805–18.
- 943 3. DeKoter RP, Singh H. Regulation of B lymphocyte and macrophage development  
944 by graded expression of PU.1. *Science*. 2000 May 26;288(5470):1439–41.
- 945 4. Tomoyasu Y. ScienceDirectUltrabithorax and the evolution of insect  
946 forewing/hindwing differentiation. *Current Opinion in Insect Science*. Elsevier Inc;  
947 2017 Feb 1;19(C):8–15.
- 948 5. White RA, Wilcox M. Distribution of Ultrabithorax proteins in *Drosophila*. *EMBO J*.  
949 1985 Aug;4(8):2035–43.
- 950 6. White RA, Wilcox M. Protein products of the bithorax complex in *Drosophila*. *Cell*.  
951 1984 Nov;39(1):163–71.
- 952 7. Bender W, Akam M, Karch F, Beachy PA, Peifer M, Spierer P, et al. Molecular  
953 Genetics of the Bithorax Complex in *Drosophila melanogaster*. *Science*. 1983 Jul  
954 1;221(4605):23–9.
- 955 8. White RAH, Akam ME. Contrabithorax mutations cause inappropriate expression  
956 of Ultrabithorax products in *Drosophila*. *Nature*. 1985 Dec 12;318(6046):567–9.
- 957 9. Little JW, Byrd CA, Brower DL. Effect of *abx*, *bx* and *pbx* mutations on expression  
958 of homeotic genes in *Drosophila* larvae. *Genetics*. 1990 Apr;124(4):899–908.
- 959 10. Müller J, Bienz M. Long range repression conferring boundaries of Ultrabithorax  
960 expression in the *Drosophila* embryo. *EMBO J*. 1991 Nov;10(11):3147–55.
- 961 11. Simon J, Peifer M, Bender W, O'Connor M. Regulatory elements of the bithorax  
962 complex that control expression along the anterior-posterior axis. *EMBO J*. 1990  
963 Dec;9(12):3945–56.
- 964 12. Peifer M, Bender W. The anterobithorax and bithorax mutations of the bithorax  
965 complex. *EMBO J*. 1986 Sep;5(9):2293–303.
- 966 13. Irvine KD, Botas J, Jha S, Mann RS, Hogness DS. Negative autoregulation by  
967 Ultrabithorax controls the level and pattern of its expression. *Development*. 1993  
968 Jan;117(1):387–99.
- 969 14. Irvine KD, Helfand SL, Hogness DS. The large upstream control region of the  
970 *Drosophila* homeotic gene Ultrabithorax. *Development*. 1991.
- 971 15. Lewis EB. A gene complex controlling segmentation in *Drosophila*. *Nature*. 1978  
972 Dec 7;276(5688):565–70.

- 973 16. Crickmore MA, Ranade V, Mann RS. Regulation of Ubx expression by epigenetic  
974 enhancer silencing in response to Ubx levels and genetic variation. *PLoS Genet.*  
975 2009 Sep;5(9):e1000633.
- 976 17. Bienz M, Tremml G. Domain of Ultrabithorax expression in *Drosophila* visceral  
977 mesoderm from autoregulation and exclusion. *Nature.* 1988 Jun  
978 9;333(6173):576–8.
- 979 18. Delker RK, Mann RS. From Reductionism to Holism: Toward a More Complete  
980 View of Development Through Genome Engineering. In: Tsang SH, editor.  
981 Precision Medicine, CRISPR, and Genome Engineering: Moving from Association  
982 to Biology and Therapeutics. Cham: Springer International Publishing; 2017. pp.  
983 45–74. (Precision Medicine, CRISPR, and Genome Engineering: Moving from  
984 Association to Biology and Therapeutics).
- 985 19. Lewis EB. Genes and Developmental Pathways. *Am Zool.* 1963;3(1):33–56.
- 986 20. Duncan I, Montgomery G. Anecdotal, historical and critical commentaries on  
987 genetics - E. B. Lewis and the bithorax complex: Part I. *Genetics.* 2002  
988 Apr;160(4):1265–72.
- 989 21. González-Gaitán MA, Micol JL, Garcia-Bellido A. Developmental genetic analysis  
990 of Contrabithorax mutations in *Drosophila melanogaster*. *Genetics.* 1990  
991 Sep;126(1):139–55.
- 992 22. Smolik-Utlaut SM. Dosage requirements of Ultrabithorax and bithoraxoid in the  
993 determination of segment identity in *Drosophila melanogaster*. *Genetics.* 1990  
994 Feb;124(2):357–66.
- 995 23. Hudson WBAA. P element homing to the *Drosophila* bithorax complex. 2000 Aug  
996 21;:1–12.
- 997 24. Rieckhof GE, Casares F, Ryoo HD, Abu-Shaar M, Mann RS. Nuclear  
998 translocation of extradenticle requires homothorax, which encodes an  
999 extradenticle-related homeodomain protein. *Cell.* 1997 Oct 17;91(2):171–83.
- 1000 25. Azpiazu N, Morata G. Functional and regulatory interactions between Hox and  
1001 extradenticle genes. *Genes Dev.* 1998 Jan 15;12(2):261–73.
- 1002 26. Noro B, Culi J, McKay DJ, Zhang W, Mann RS. Distinct functions of  
1003 homeodomain-containing and homeodomain-less isoforms encoded by  
1004 homothorax. *Genes Dev.* 2006 Jun 15;20(12):1636–50.
- 1005 27. Kurant E, Eytan D, Salzberg A. Mutational analysis of the *Drosophila* homothorax  
1006 gene. *Genetics.* 2001 Feb;157(2):689–98.
- 1007 28. Slattery M, Ma L, Négre N, White KP, Mann RS. Genome-wide tissue-specific  
1008 occupancy of the Hox protein Ultrabithorax and Hox cofactor Homothorax in

- 1009 Drosophila. PLoS ONE. 2011;6(4):e14686.
- 1010 29. McKay DJ, Lieb JD. A common set of DNA regulatory elements shapes  
1011 Drosophila appendages. Dev Cell. 2013 Nov 11;27(3):306–18.
- 1012 30. Rastogi C, Rube HT, Kribelbauer JF, Crocker J, Loker RE, Martini GD, et al.  
1013 Accurate and sensitive quantification of protein-DNA binding affinity. Proceedings  
1014 of the National Academy of Sciences. 2018 Apr 17;115(16):E3692–701.
- 1015 31. Slattery M, Riley T, Liu P, Abe N, Gomez-Alcala P, Dror I, et al. Cofactor binding  
1016 evokes latent differences in DNA binding specificity between Hox proteins. Cell.  
1017 2011 Dec 9;147(6):1270–82.
- 1018 32. Crocker J, Abe N, Rinaldi L, McGregor AP, Frankel N, Wang S, et al. Low Affinity  
1019 Binding Site Clusters Confer Hox Specificity and Regulatory Robustness. Cell.  
1020 Elsevier Inc; 2015 Jan 15;160(1-2):191–203.
- 1021 33. Liu Z, Tjian R. Visualizing transcription factor dynamics in living cells. J Cell Biol.  
1022 2018 Jan 29.
- 1023 34. Caussinus E, Kanca O, Affolter M. Fluorescent fusion protein knockout mediated  
1024 by anti-GFP nanobody. Nat Struct Mol Biol. 2011 Dec 11;19(1):117–21.
- 1025 35. Caussinus E, Kanca O, Affolter M. Protein knockouts in living eukaryotes using  
1026 deGradFP and green fluorescent protein fusion targets. Curr Protoc Protein Sci.  
1027 2013 Sep 24;73:Unit30.2.
- 1028 36. Crocker J, Noon EP-B, Stern DL. The Soft Touch: Low-Affinity Transcription  
1029 Factor Binding Sites in Development and Evolution. 1st ed. Vol. 117, Essays on  
1030 Developmental Biology Part B. Elsevier Inc; 2016. 15 p.
- 1031 37. Liu Z, Tjian R. Visualizing transcription factor dynamics in living cells. J Cell Biol.  
1032 2018 Apr 2;217(4):1181–91.
- 1033 38. Port F, Chen HM, Lee T, Bullock SL. Optimized CRISPR/Cas tools for efficient  
1034 germline and somatic genome engineering in Drosophila. Proceedings of the  
1035 National Academy of Sciences. 2014 Jul 7.
- 1036 39. Voutev R, Mann RS. Robust  $\Phi$ C31-Mediated Genome Engineering in Drosophila  
1037 melanogaster Using Minimal attP/attB Phage Sites. G3 (Bethesda). 2018 May  
1038 4;8(5):1399–402.
- 1039 40. Kondo S, Ueda R. Highly Improved Gene Targeting by Germline-Specific Cas9  
1040 Expression in Drosophila. Genetics. 2013 Sep 3.
- 1041 41. Ryoo HD, Mann RS. The control of trunk Hox specificity and activity by  
1042 Extradenticle. Genes Dev. 1999 Jul 1;13(13):1704–16.

- 1043 42. Mann RS, Abu-Shaar M. Nuclear import of the homeodomain protein  
1044 extradenticle in response to Wg and Dpp signalling. *Nature*. 1996 Oct  
1045 17;383(6601):630–3.
- 1046 43. Slattery M, Voutev R, Ma L, Négre N, White KP, Mann RS. Divergent  
1047 Transcriptional Regulatory Logic at the Intersection of Tissue Growth and  
1048 Developmental Patterning. Desplan C, editor. *PLoS Genet*. 2013 Sep  
1049 5;9(9):e1003753.
- 1050 44. Estella C, McKay DJ, Mann RS. Molecular integration of wingless,  
1051 decapentaplegic, and autoregulatory inputs into Distalless during *Drosophila* leg  
1052 development. *Dev Cell*. 2008 Jan;14(1):86–96.
- 1053 45. Gebelein B, Culi J, Ryoo HD, Zhang W, Mann RS. Specificity of Distalless  
1054 repression and limb primordia development by abdominal Hox proteins. *Dev Cell*.  
1055 2002 Oct;3(4):487–98.
- 1056

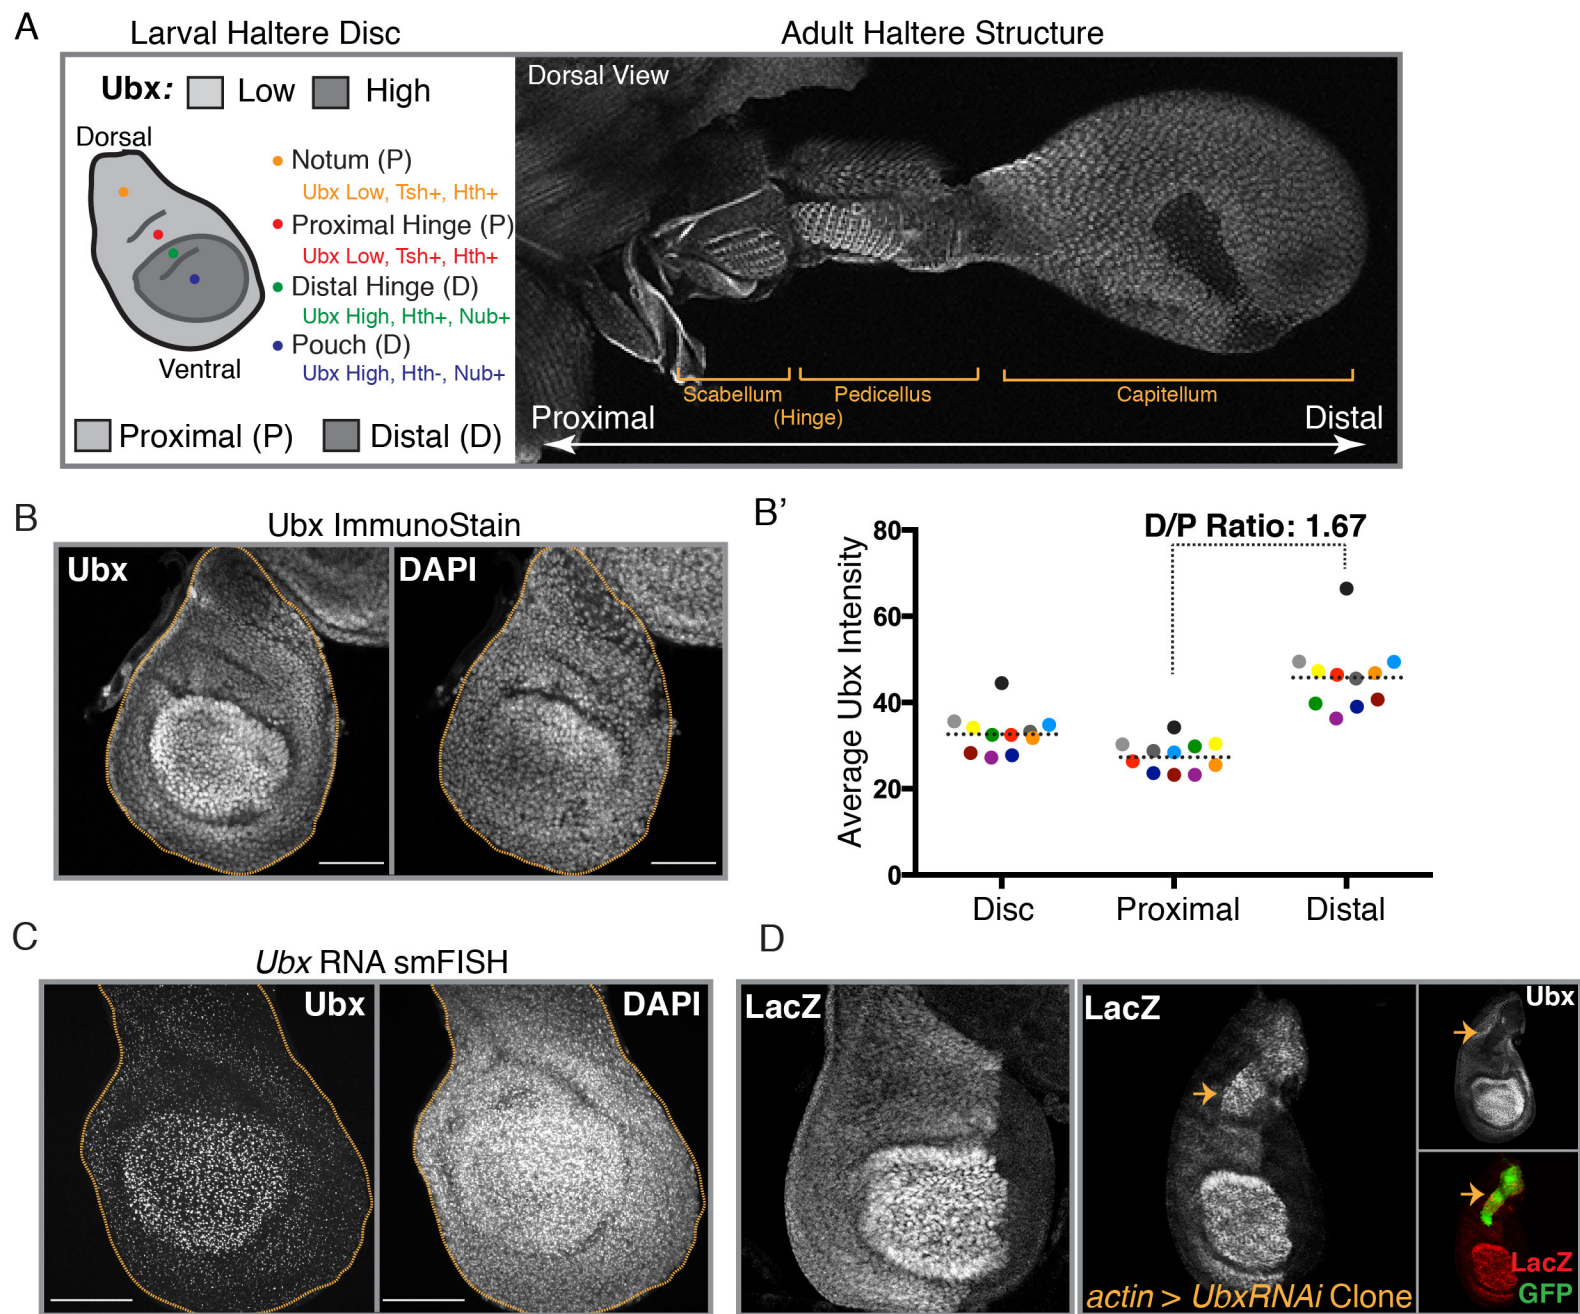

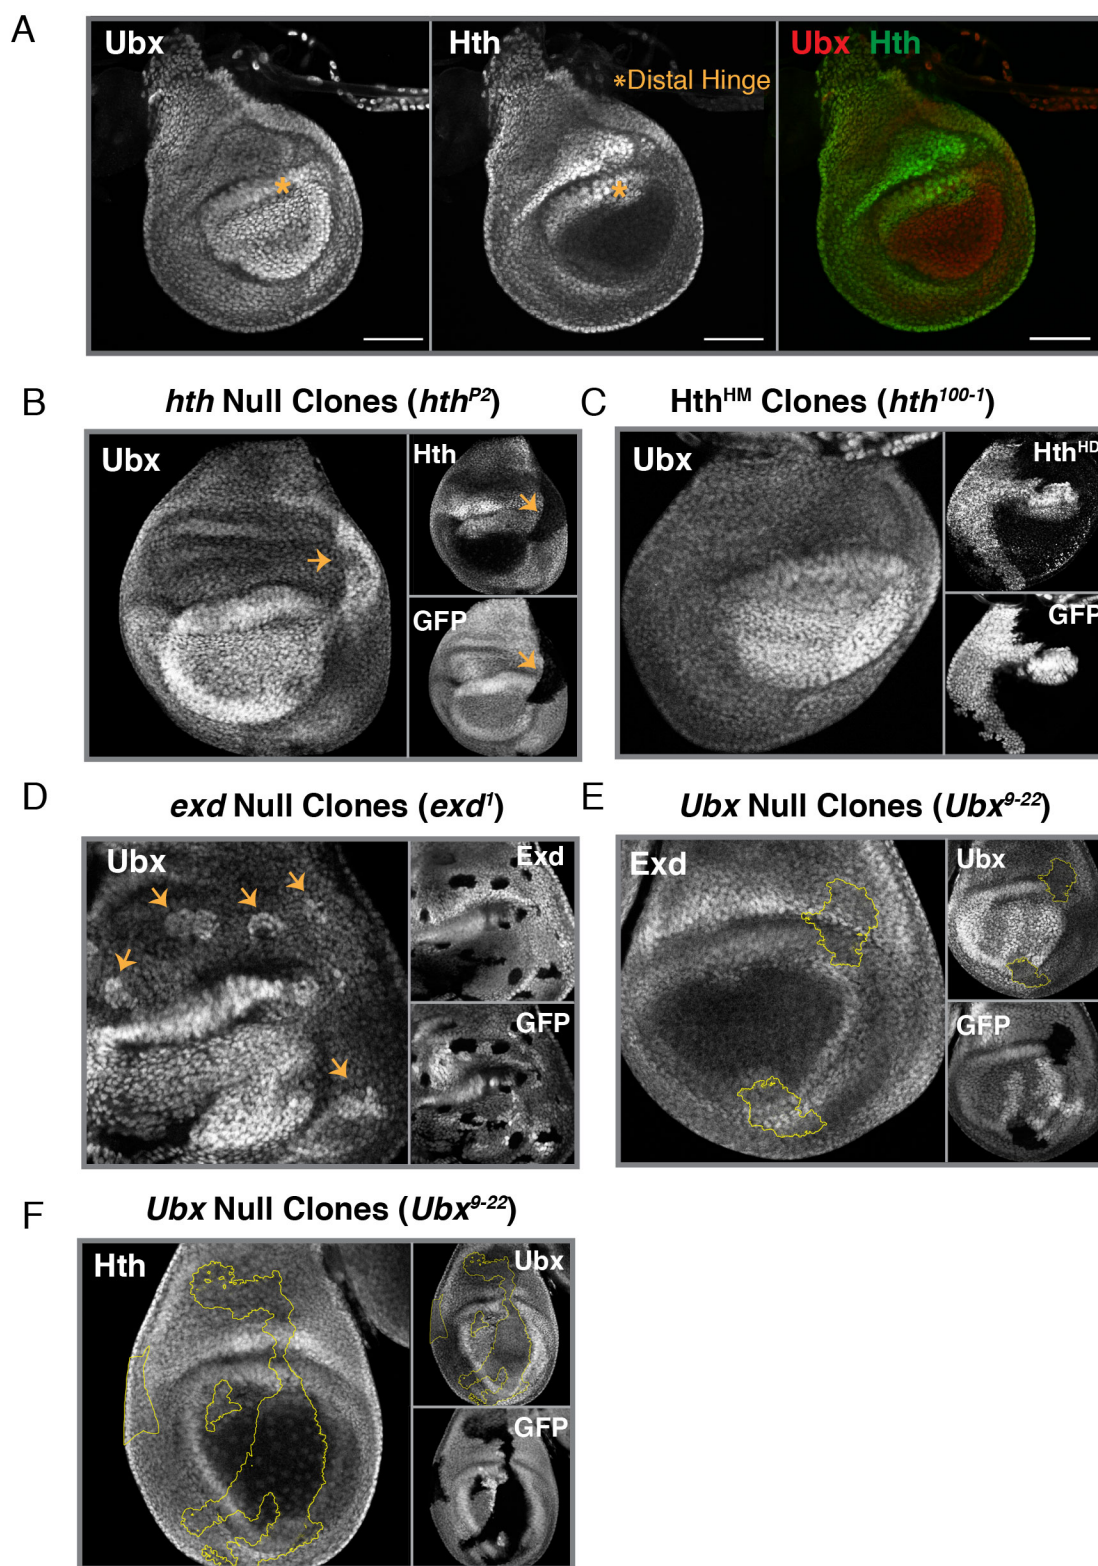



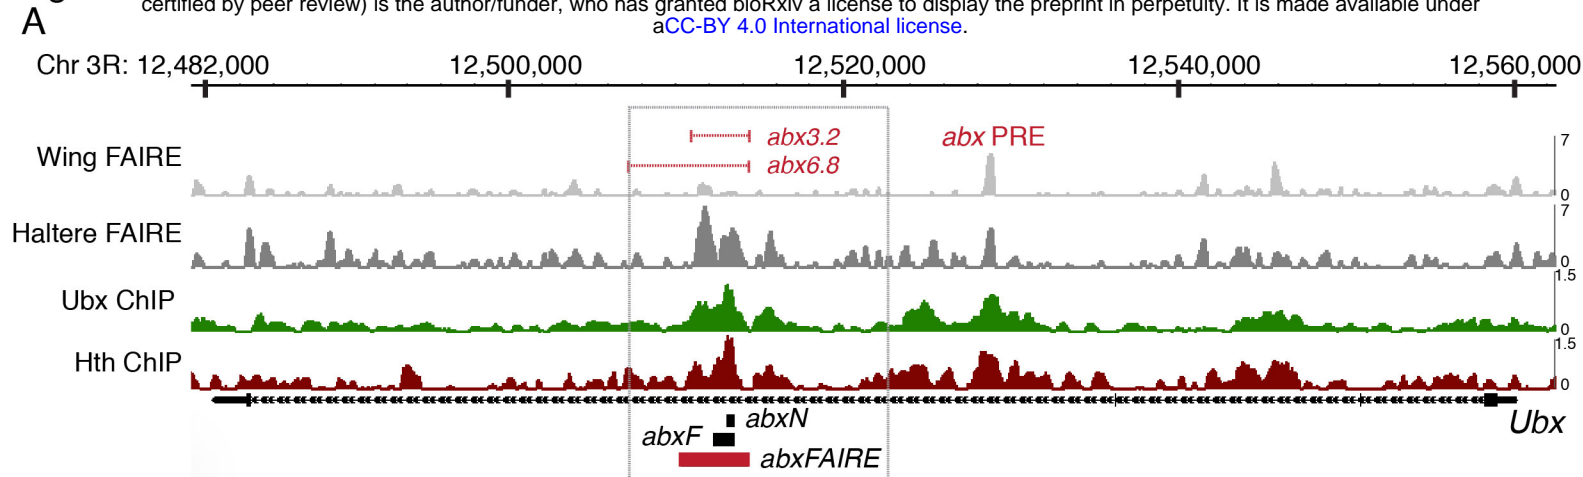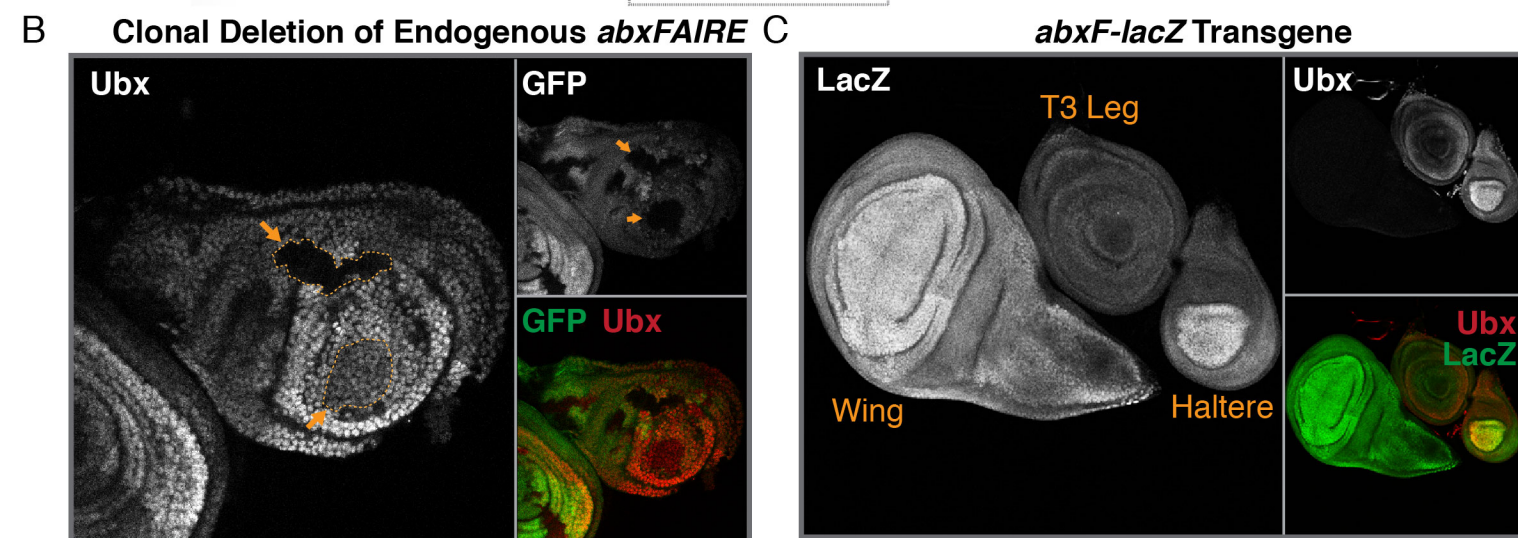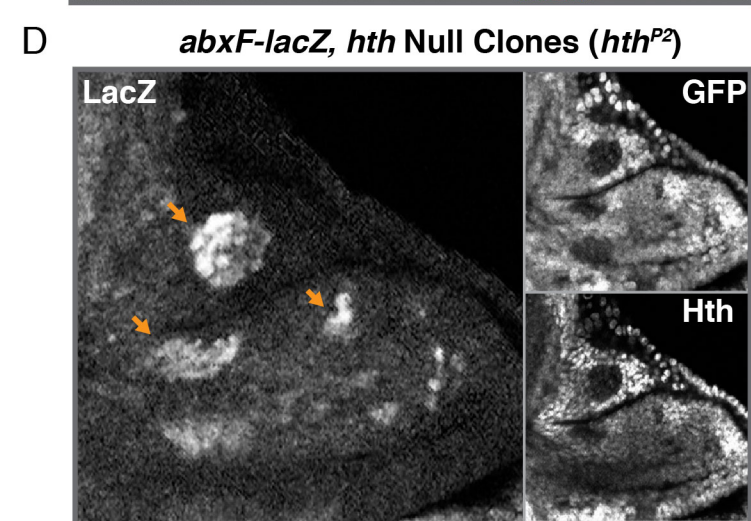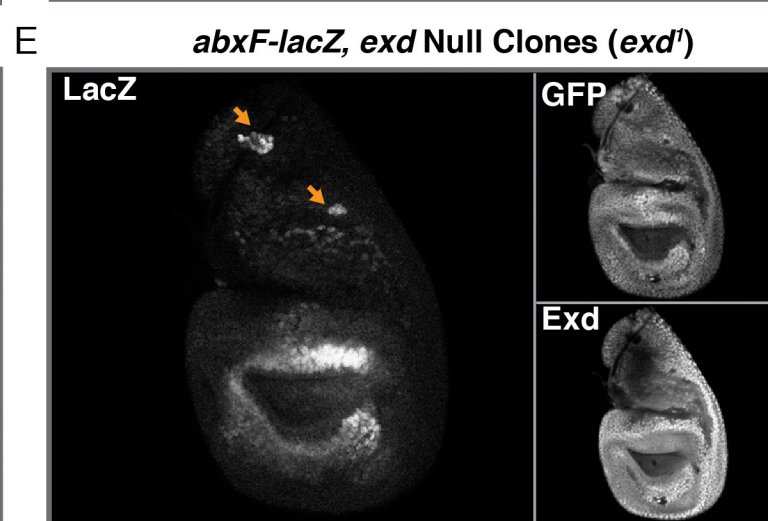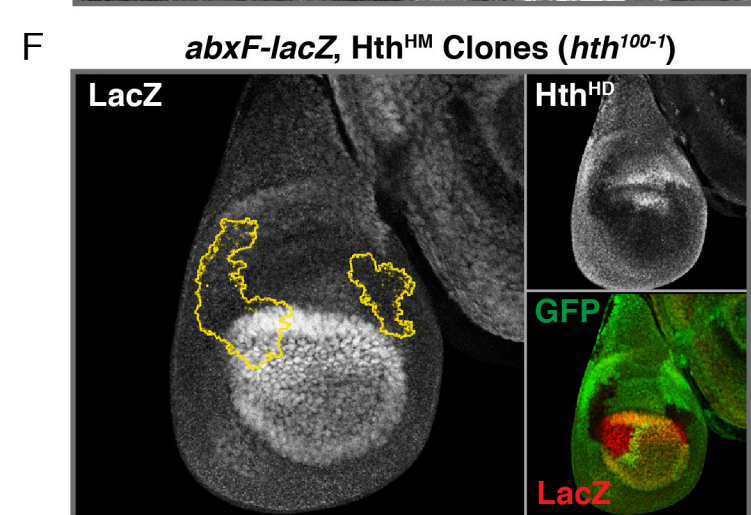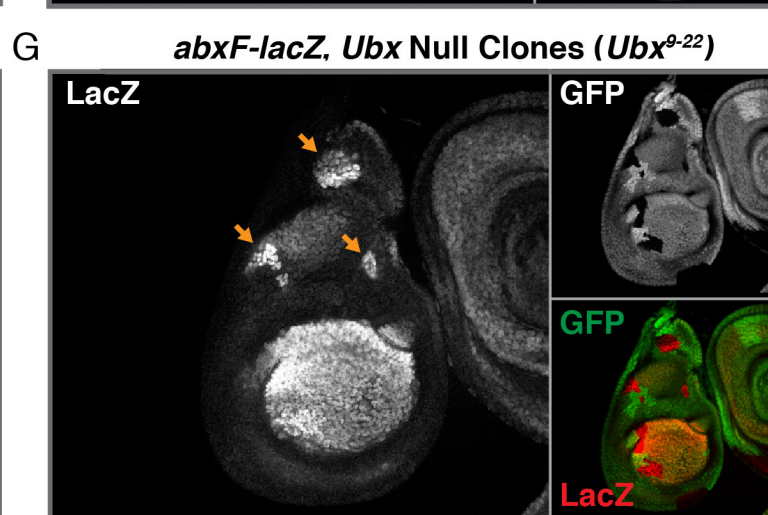

# Figure 4

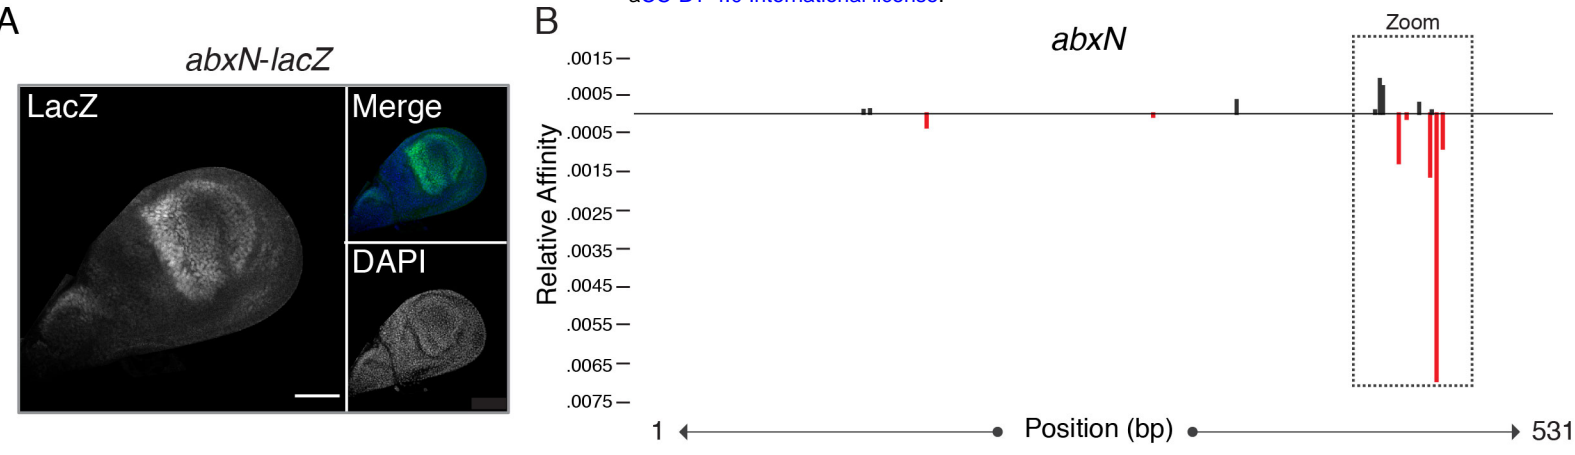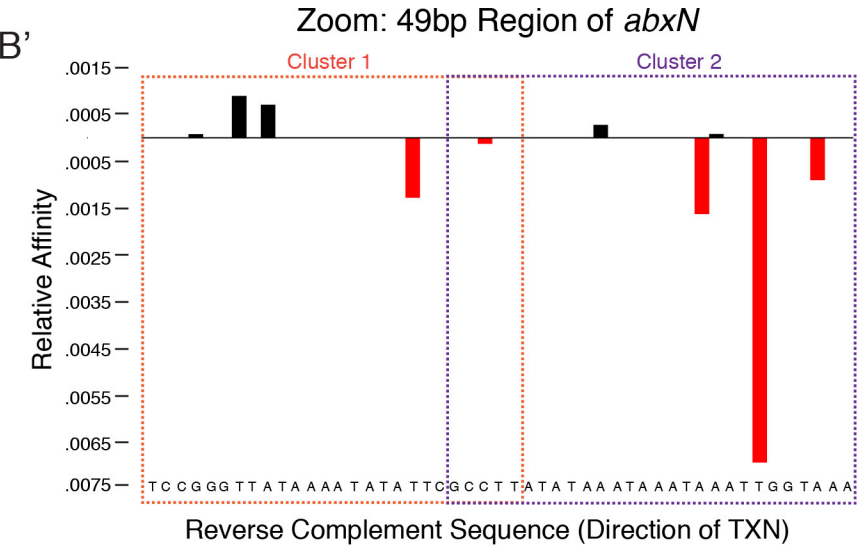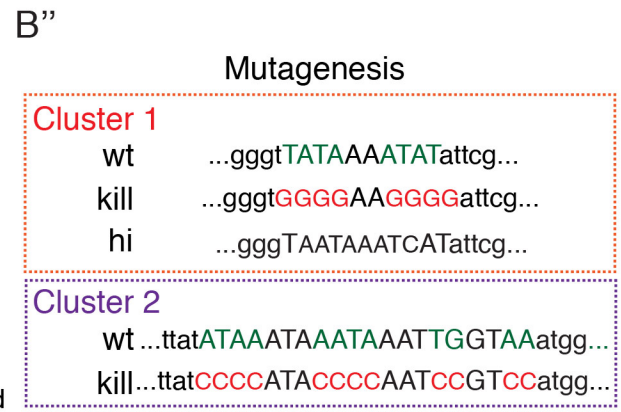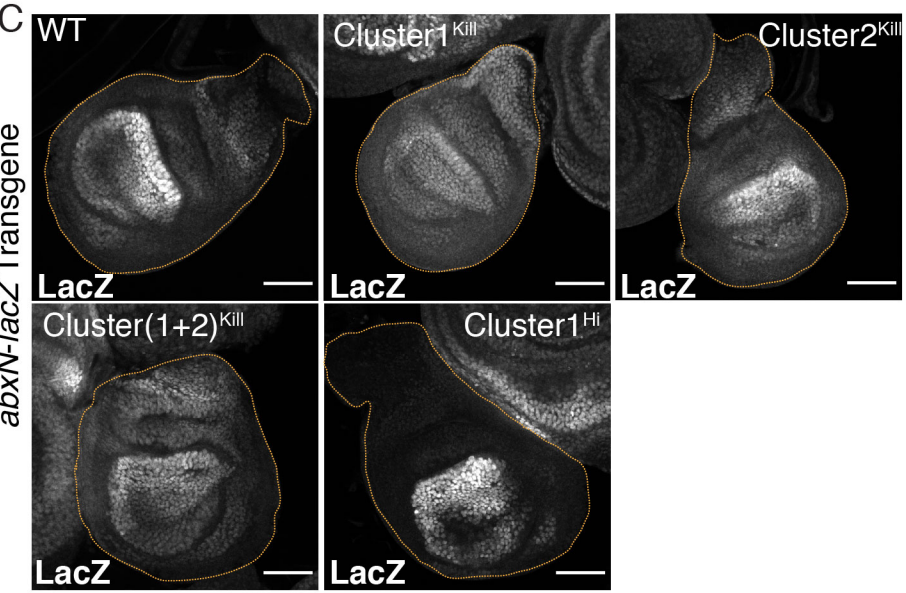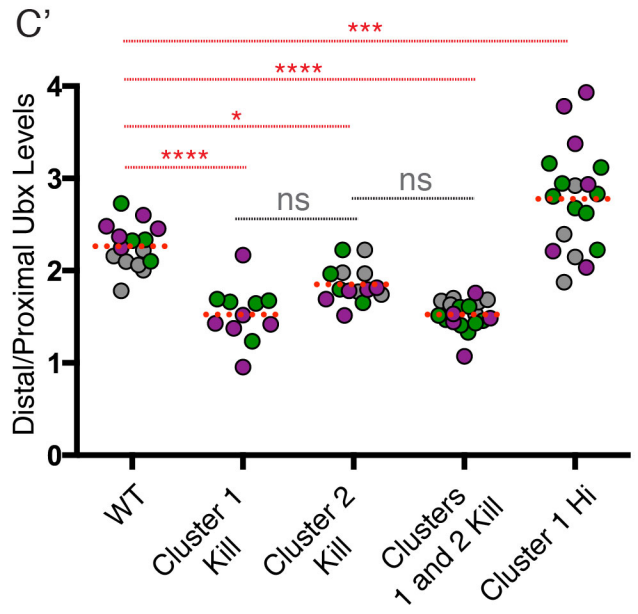

## Figure 5

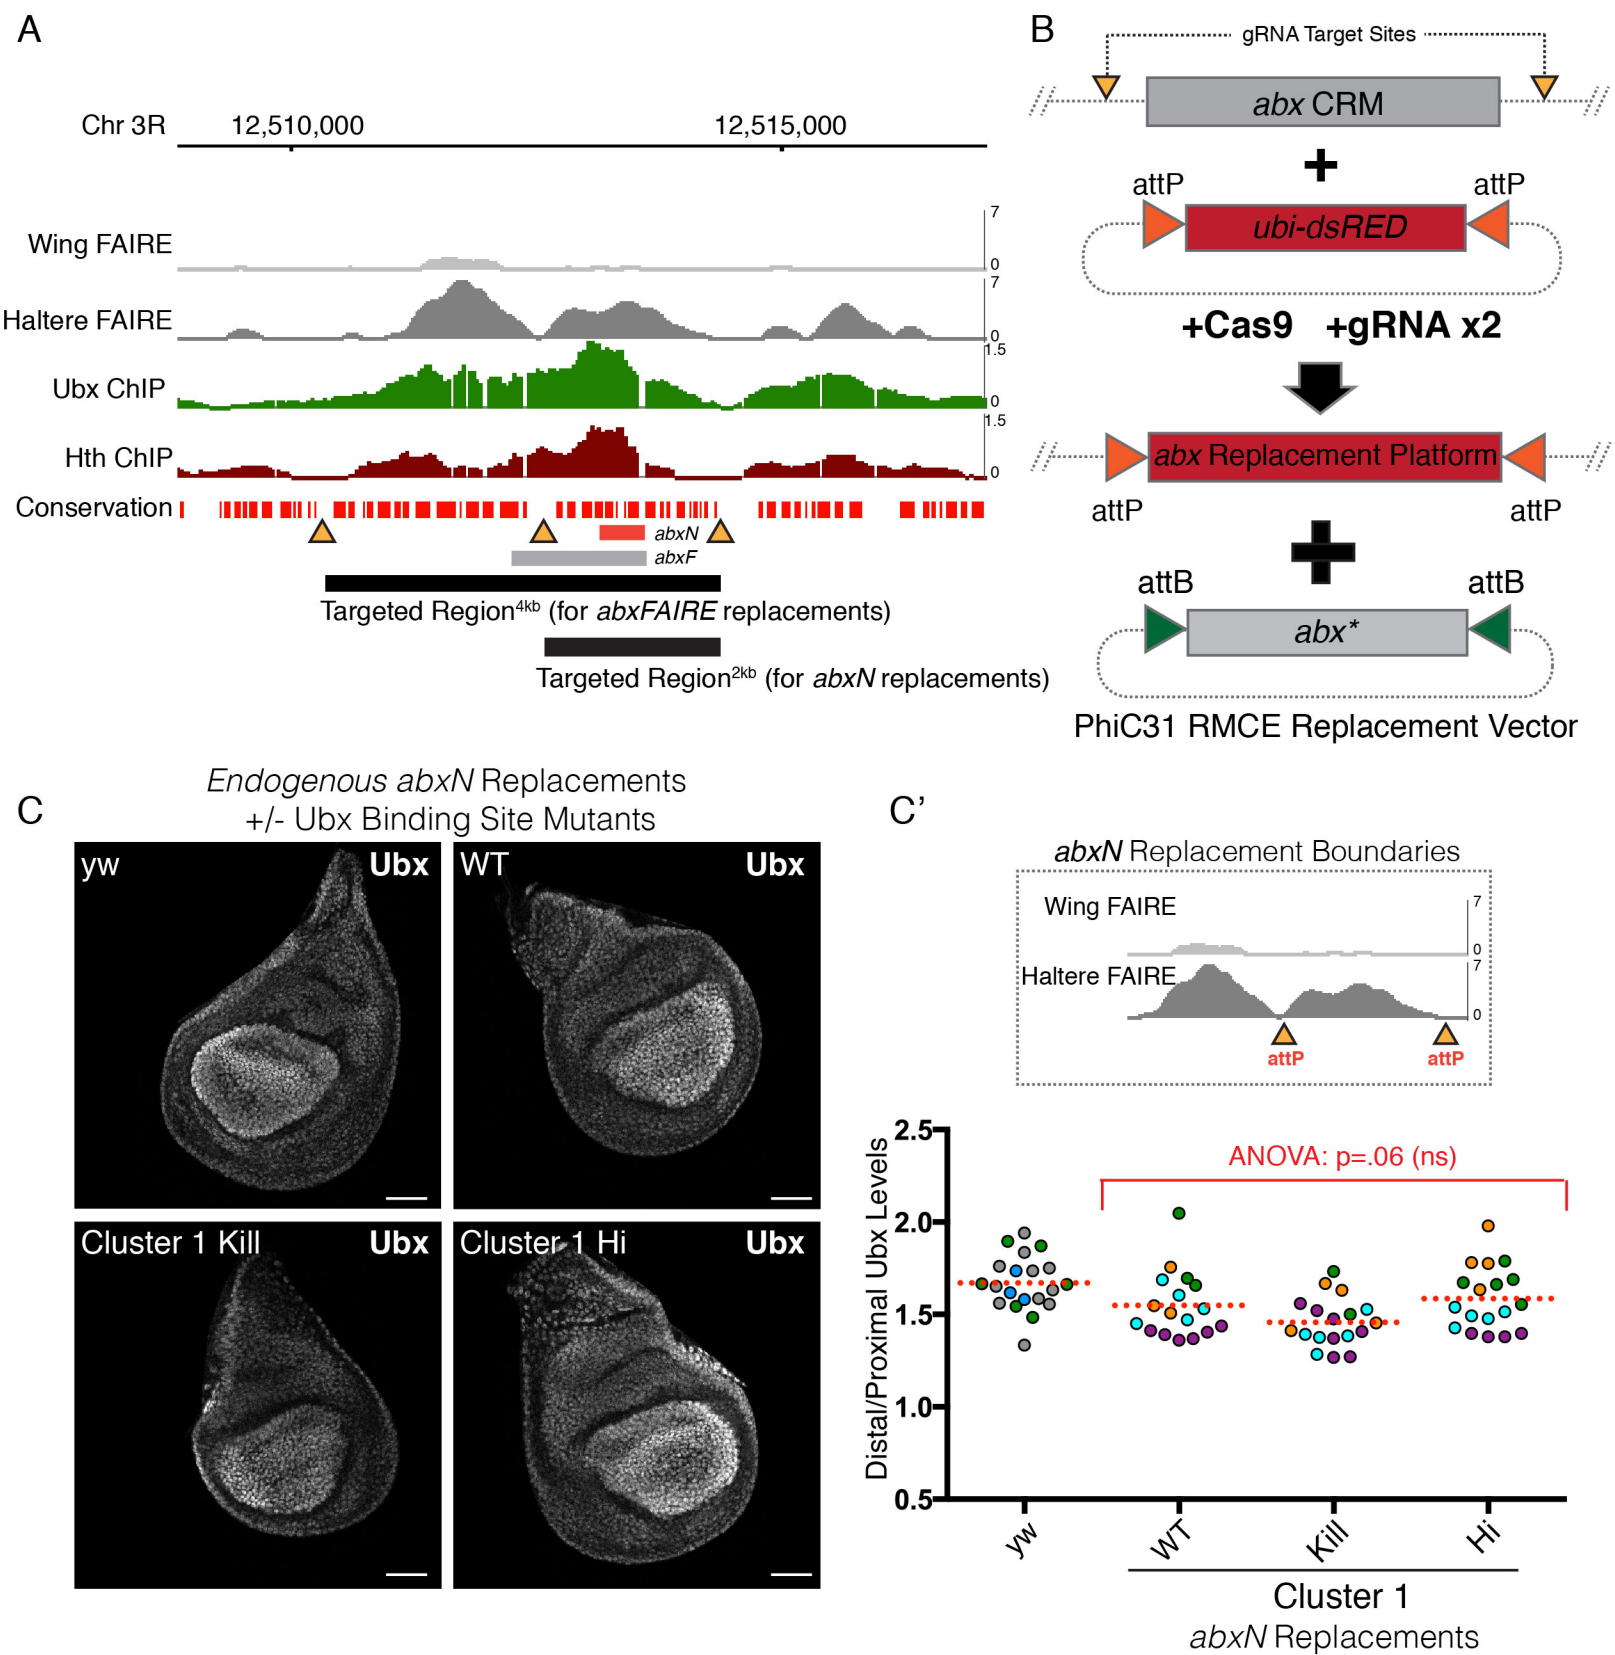

# Figure 6

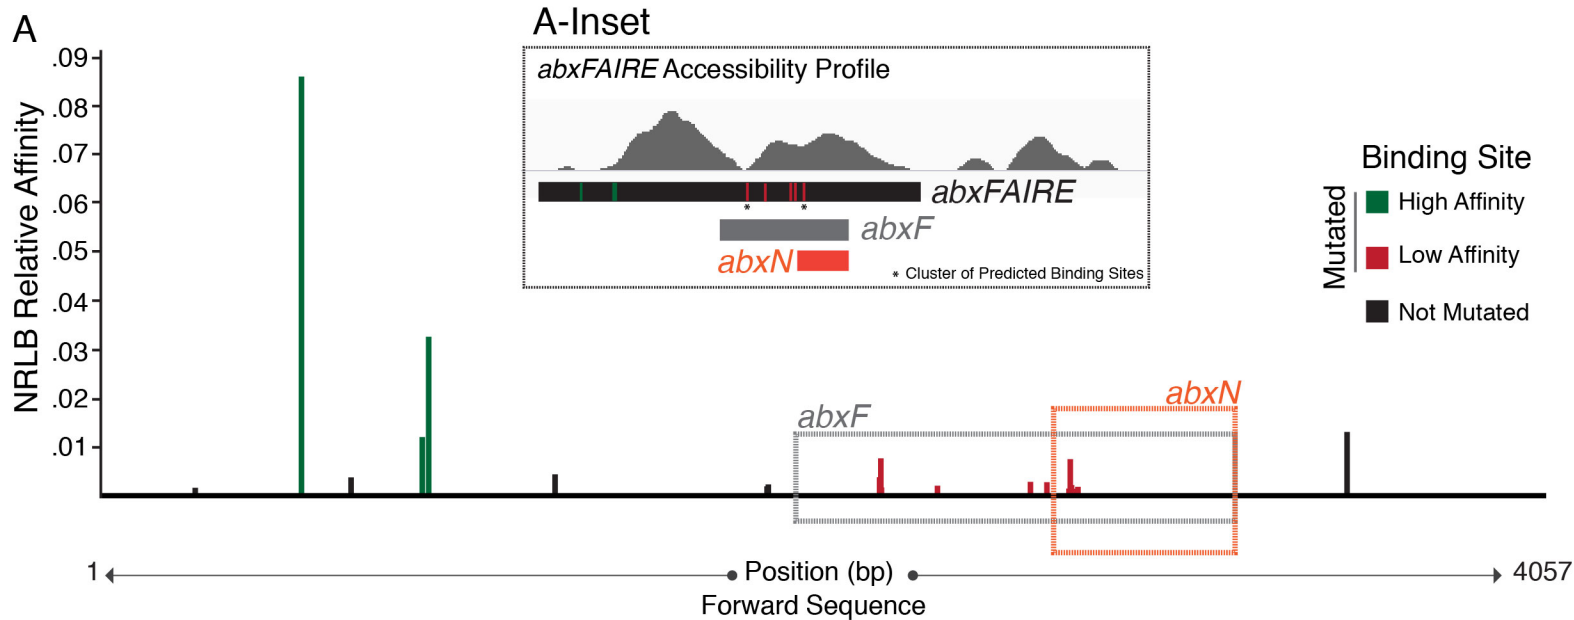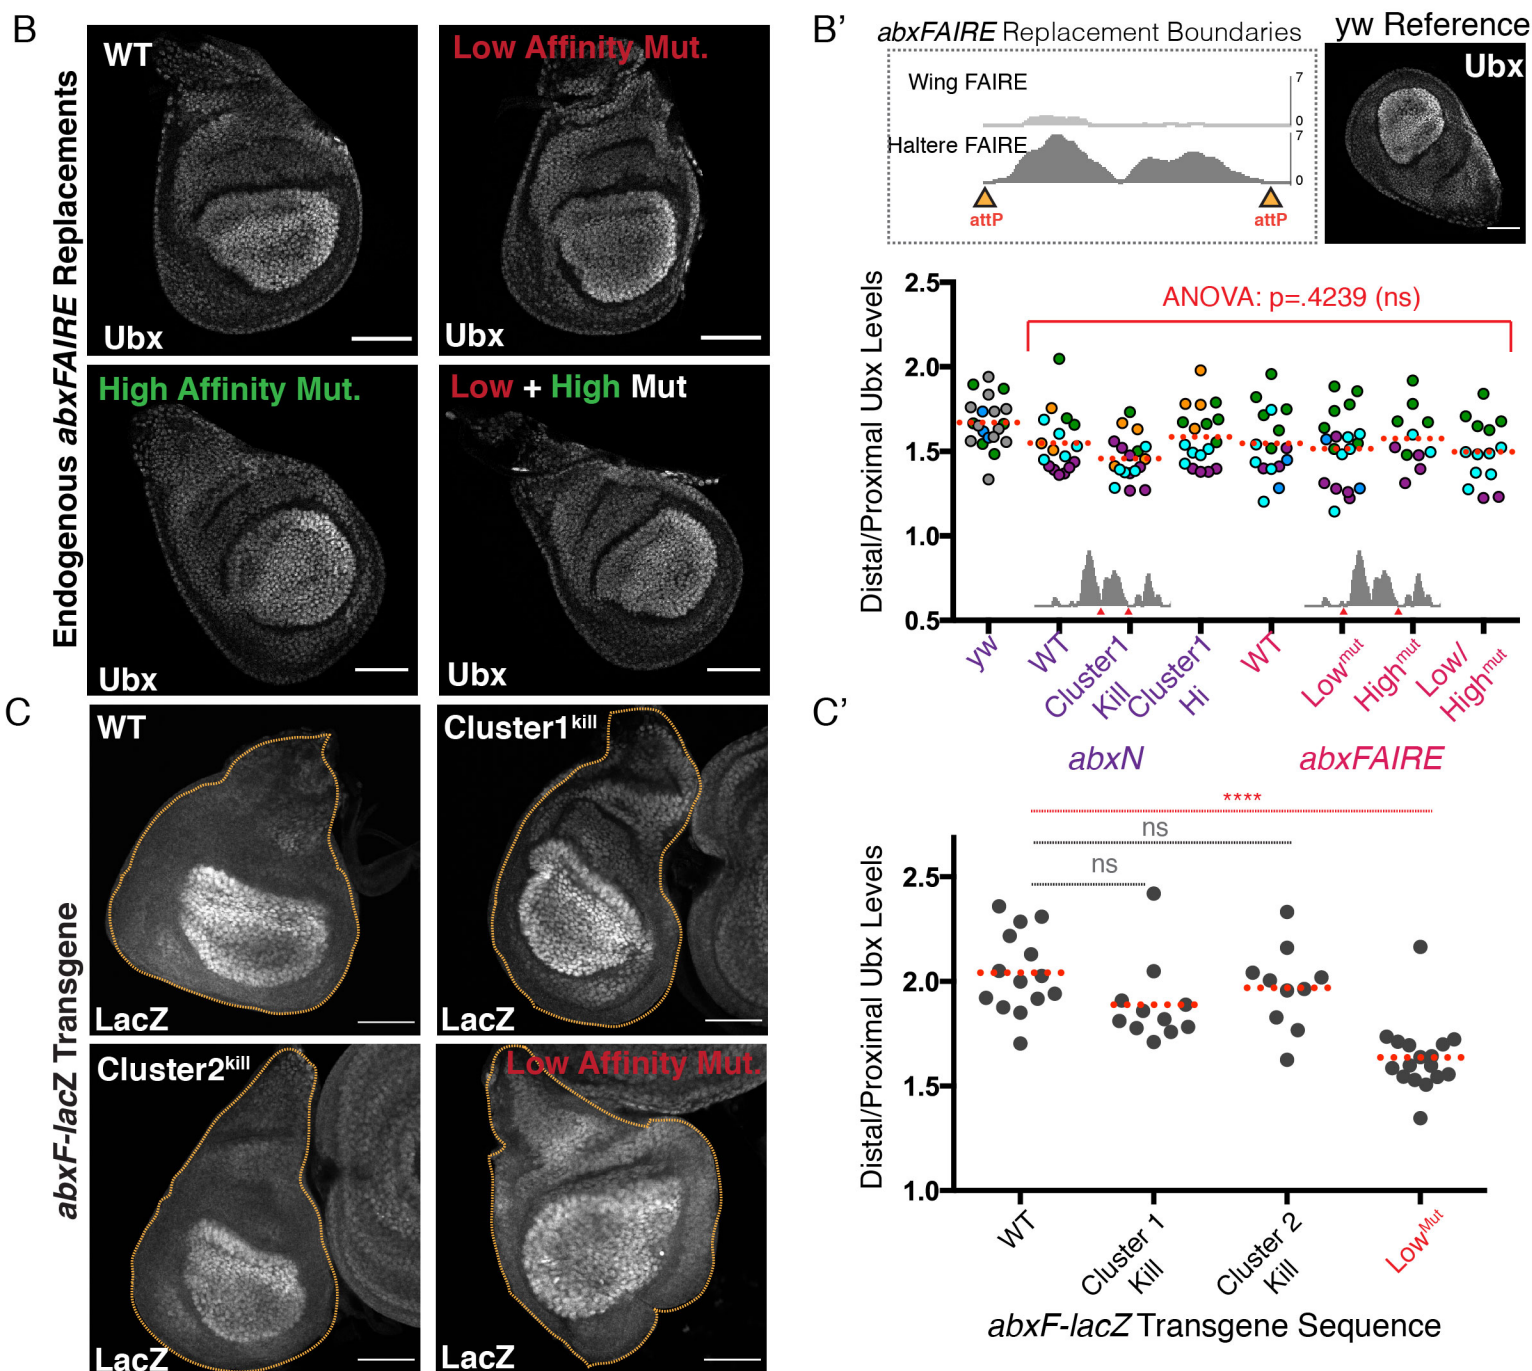

Figure 6

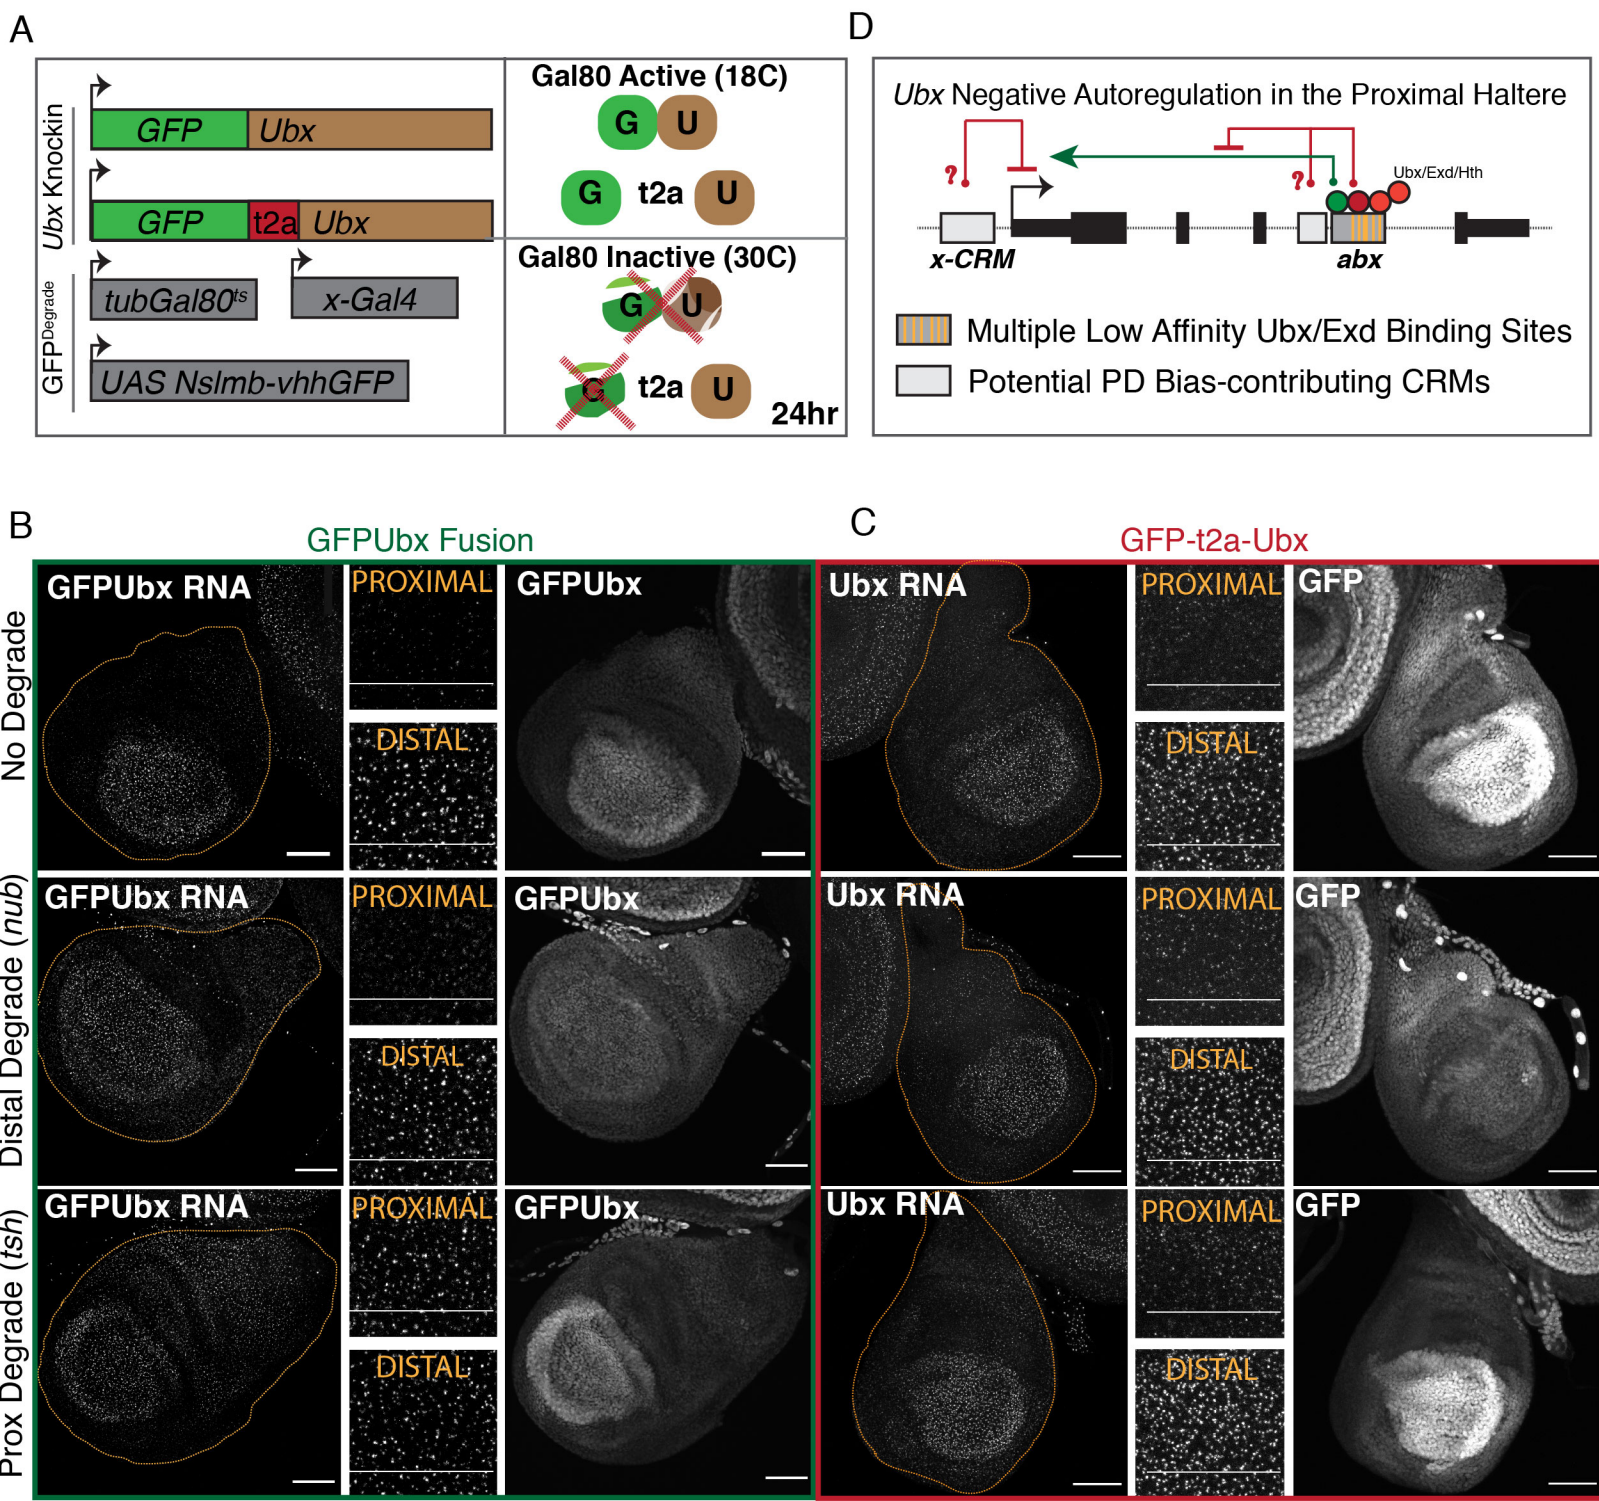

A

### ROI Selection and Removal in FIJI

'Distal' ROI defined using natural folds around distal pouch  
'Clear Outside' used to obtain Distal Stack  
'Clear' used to obtain Proximal Stack

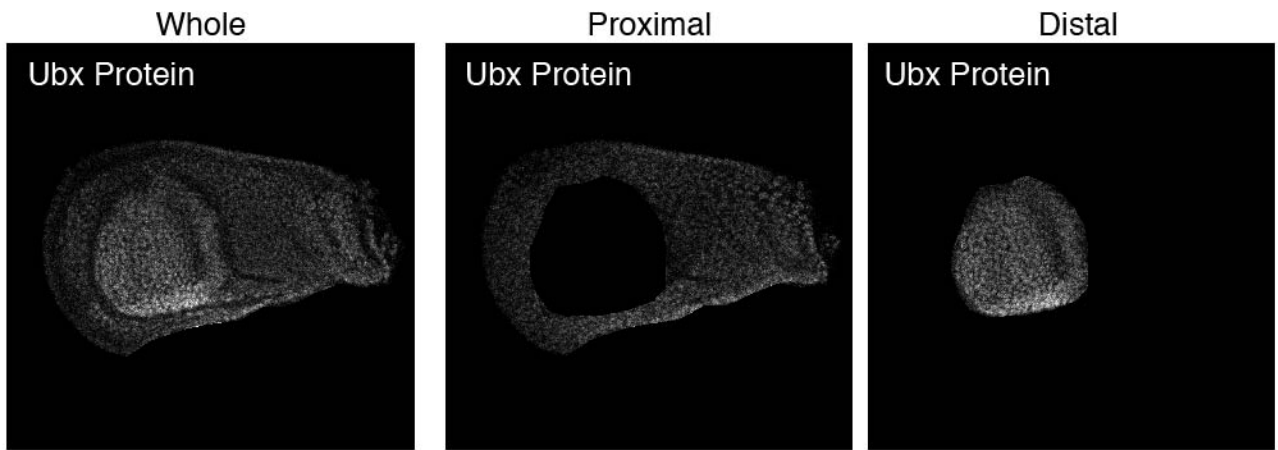

### Quantification in FIJI

Set Threshold from 1-255 to remove black pixels  
Use 'Multi-measure' to measure average intensity of Ubx in each slice in stack  
For Single Disc Analysis: each point represents mean Ubx intensity in slice  
For Multi Disc Analysis: each point represents average of the mean Ubx intensity across all slices in a single disc

B

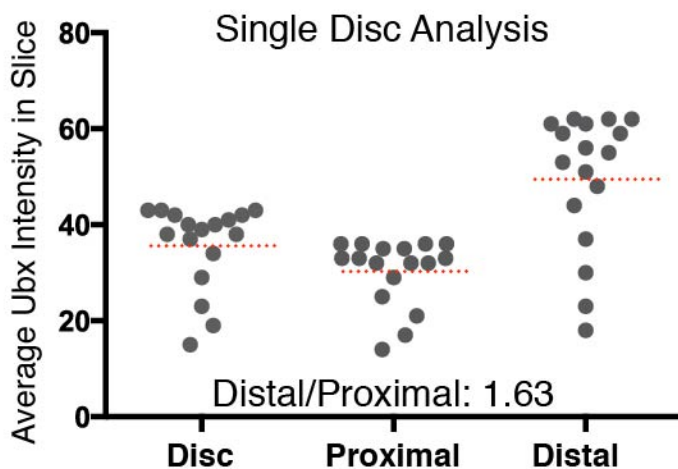

C

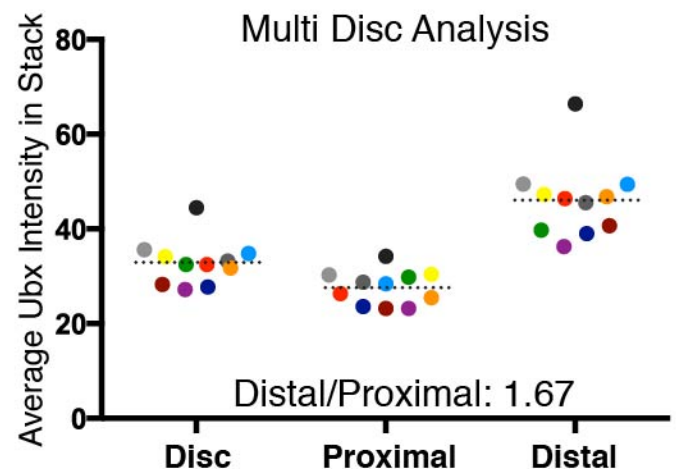

Figure 2 Supplemental 1

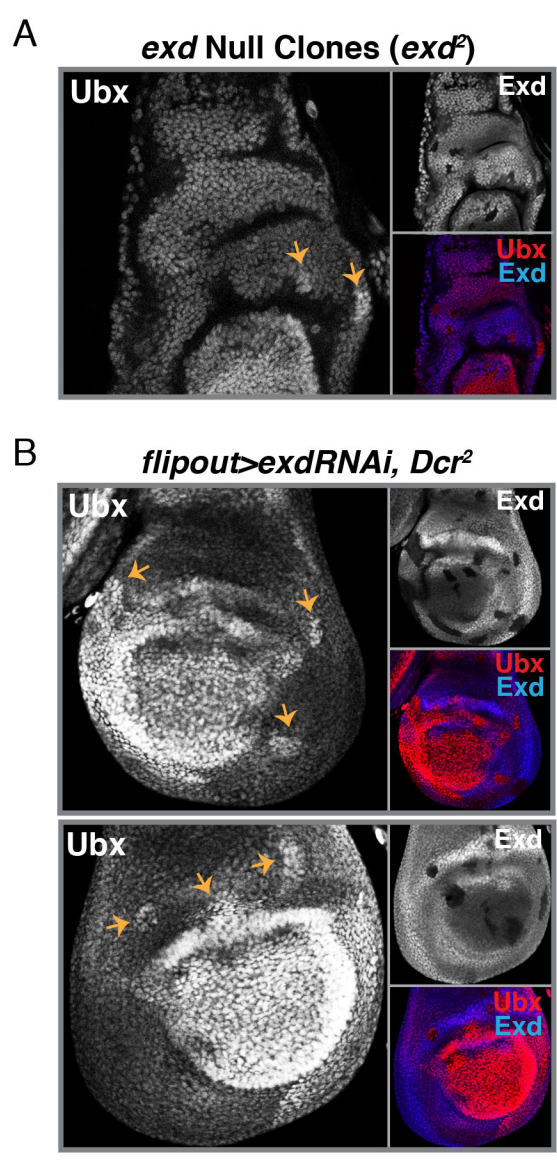

# Figure 3 Supplemental

A

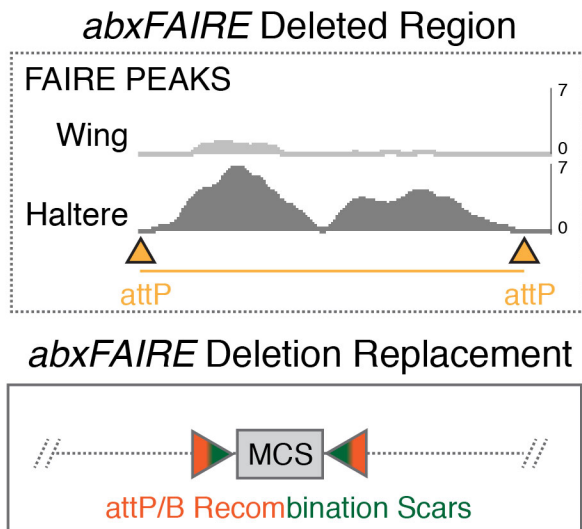

B

Clonal Deletion of *abxFAIRE* (GFP- Clones)

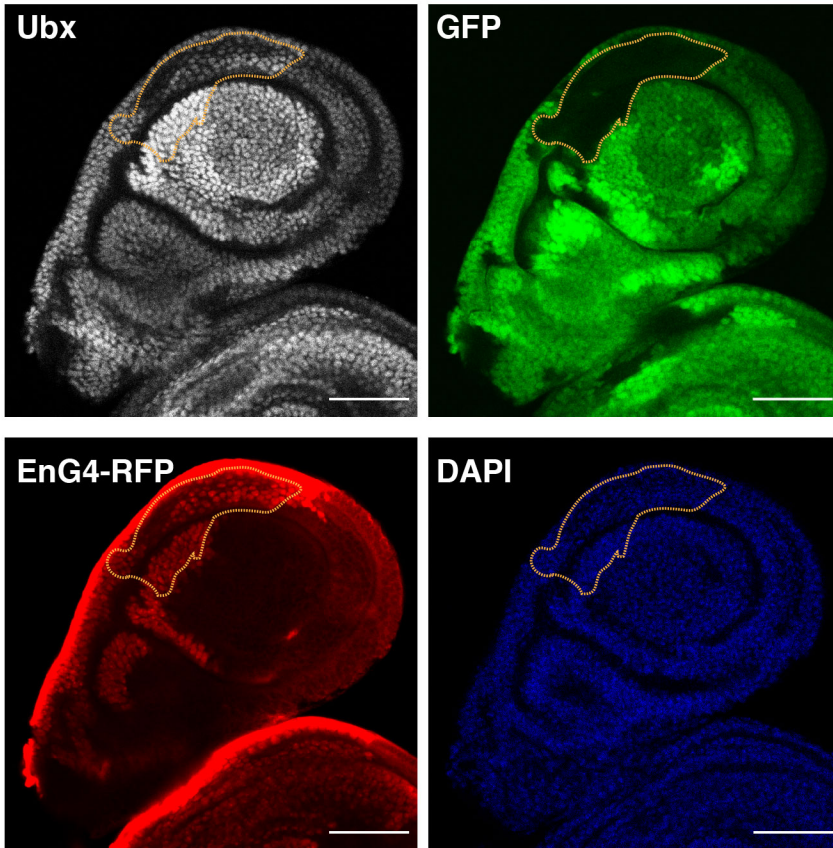

\*Clones made 48hr AEL

B'

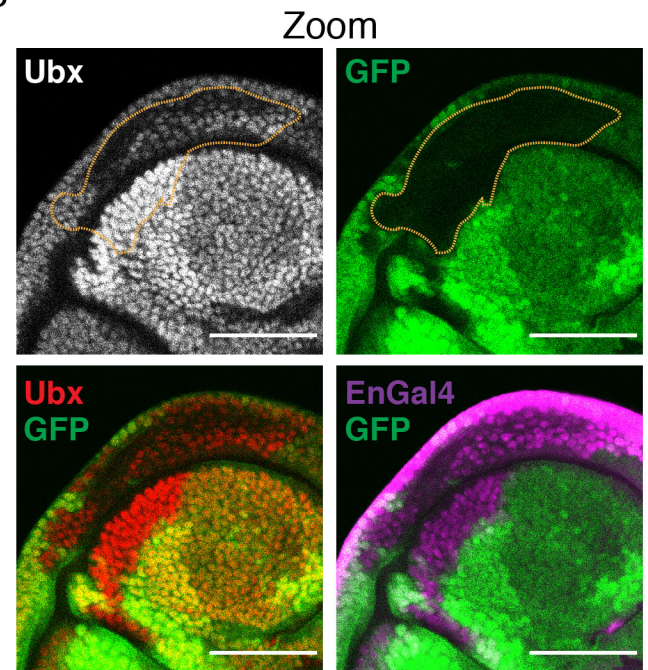



# Figure 4 Supplemental 1

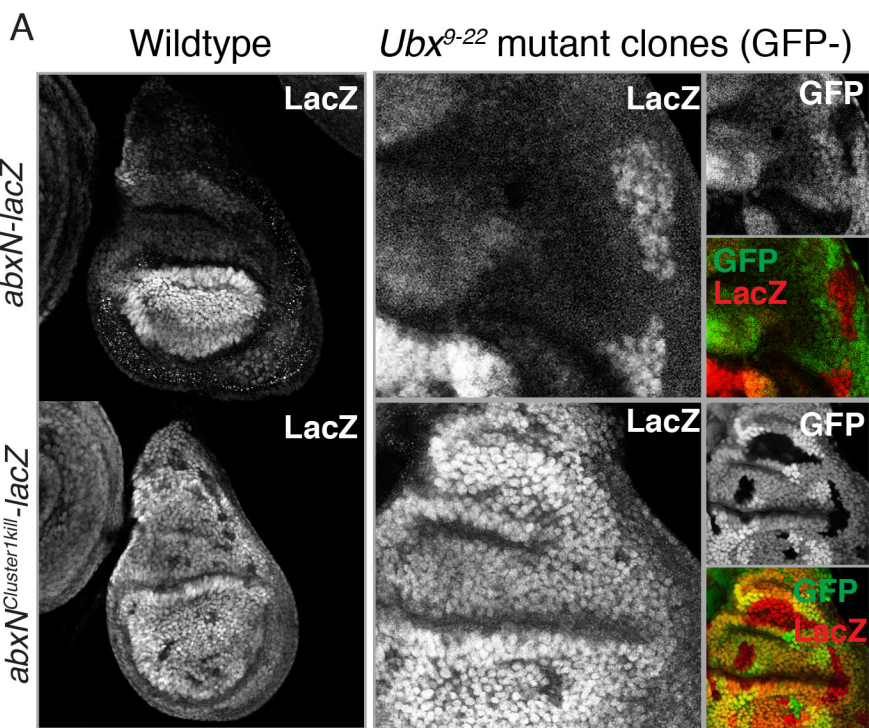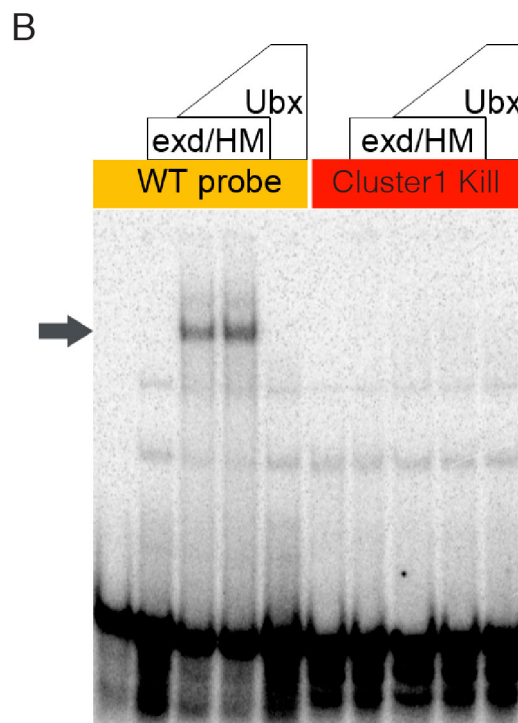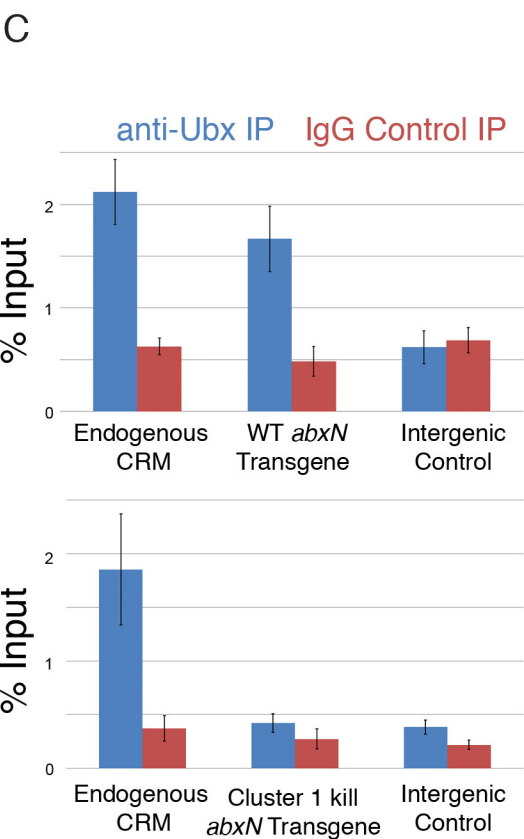

# Figure 5 Supplemental 1

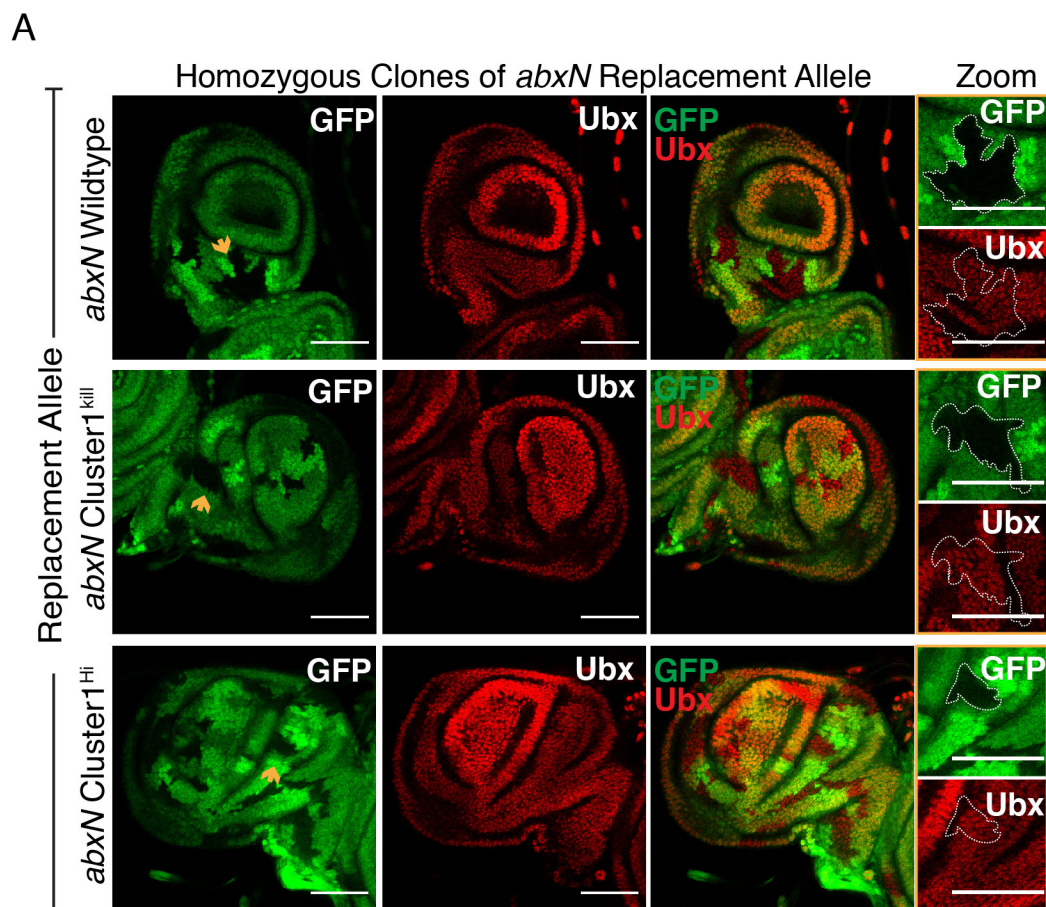

A

| Name | # Predicted BS | Minus Strand Sequence                     |                                            | NRLB Relative Affinities | Category |
|------|----------------|-------------------------------------------|--------------------------------------------|--------------------------|----------|
|      |                | WT Sequence                               | Mutant Sequence                            |                          |          |
| C1   | 2              | CCGGGTtAtAAaaTAtTTCGCC                    | CCGGGTtggAAggTAggTTCGCC                    | 8.96E-4, 1.28E-3         | Low      |
| C2   | 3              | GCCTTAtATAAAATaaTAaaTTGGTA                | GCCTTggATggATAggTAggTTGGTA                 | 9.03E-4, 1.6E-3, 6.9E-3  |          |
| BS3  | 1              | CGATGAtaaATGCGACAA                        | CGATGAgggATGCGACAA                         | 2.2E-3                   |          |
| BS4  | 1              | ATTGAattATTTGCTCG                         | ATTGAggggATTTGCTCG                         | 2.3E-3                   |          |
| BS5  | 1              | GGGAAttgTCAATCATCG                        | GGGAAcccTCAATCATCG                         | 1.5E-3                   |          |
| C6   | 3              | ATATtATTAatAAAAtTTtCATTT                  | ATATggTTAaggAAAaggTTgCATTT                 | 1.2E-3, 3.3E-3, 7E-3     |          |
| BS7  | 1              | CTGTGattATGGCTGGA                         | CTGTGccccATGGCTGGA                         | 8.5E-2                   | High     |
| C8   | 2              | TCGAGattATGGTCCATG<br>CGGCAGTTGTaaatCAAAT | TCGAGccccATGGTCCATG<br>CGGCAGTTGTggggCAAAT | 1.1E-2, 3.2E-2           |          |

"C"= Cluster, "BS"= Binding Site

B

Homozygous Clones of *abxFAIRE* Replacement Allele

Zoom

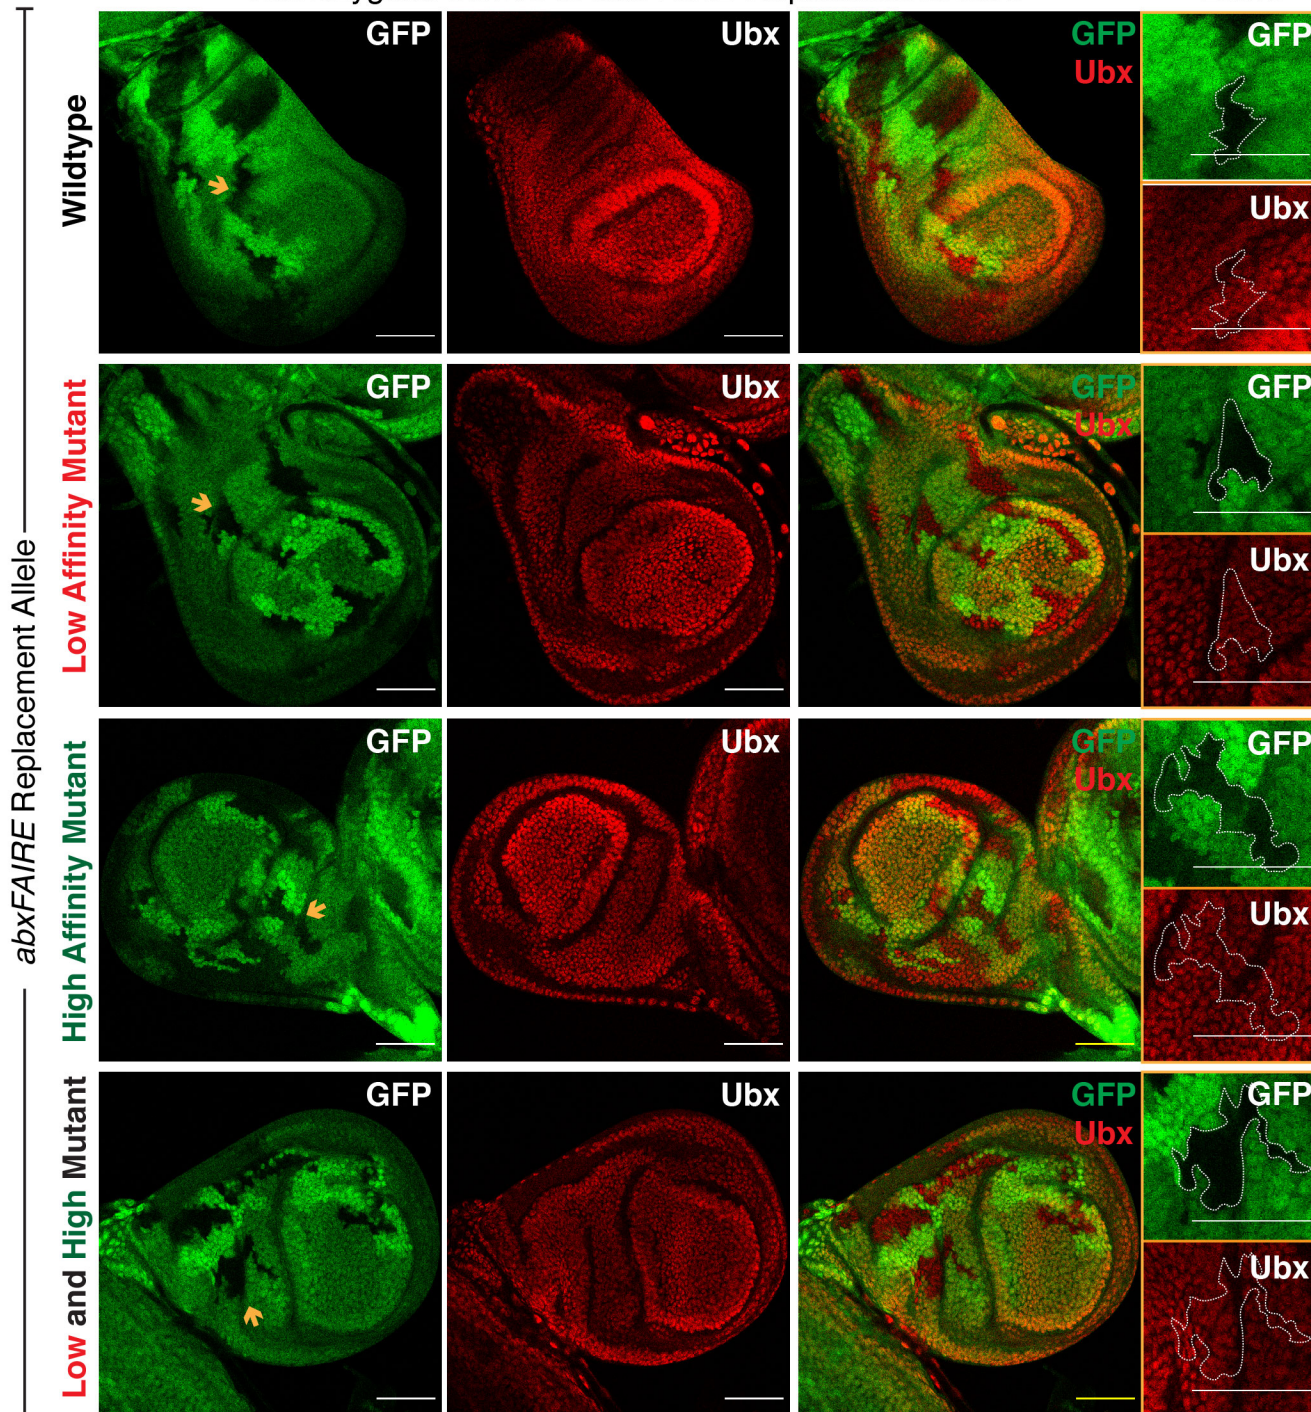

# Figure 6 Supplemental 2

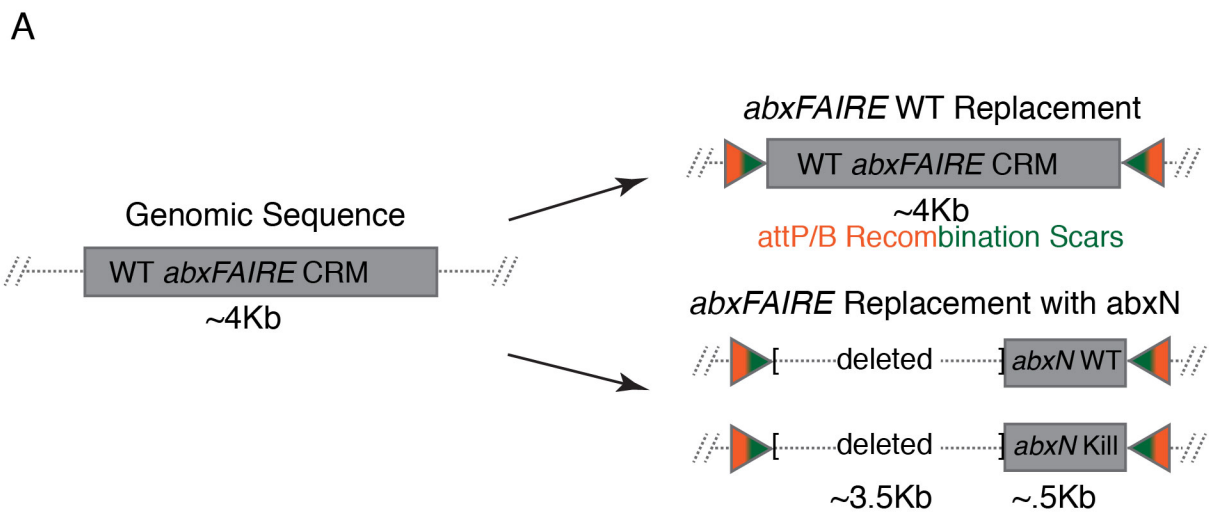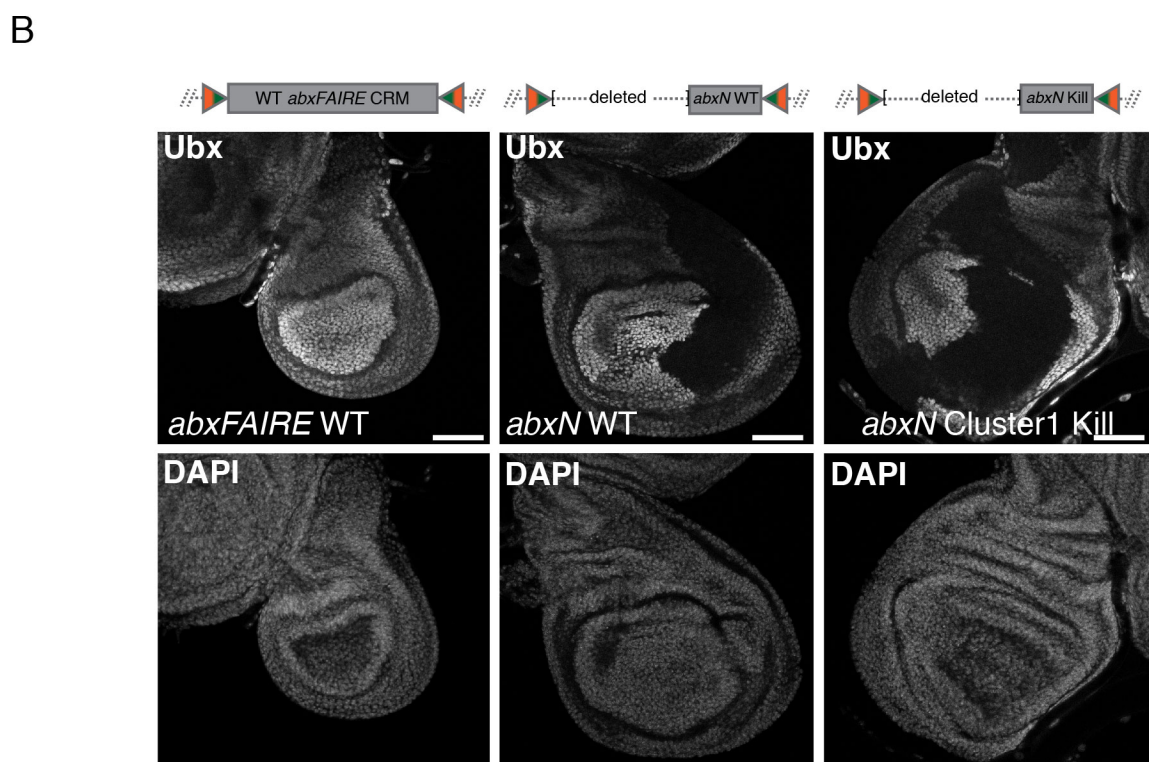

# Figure 7 Supplemental

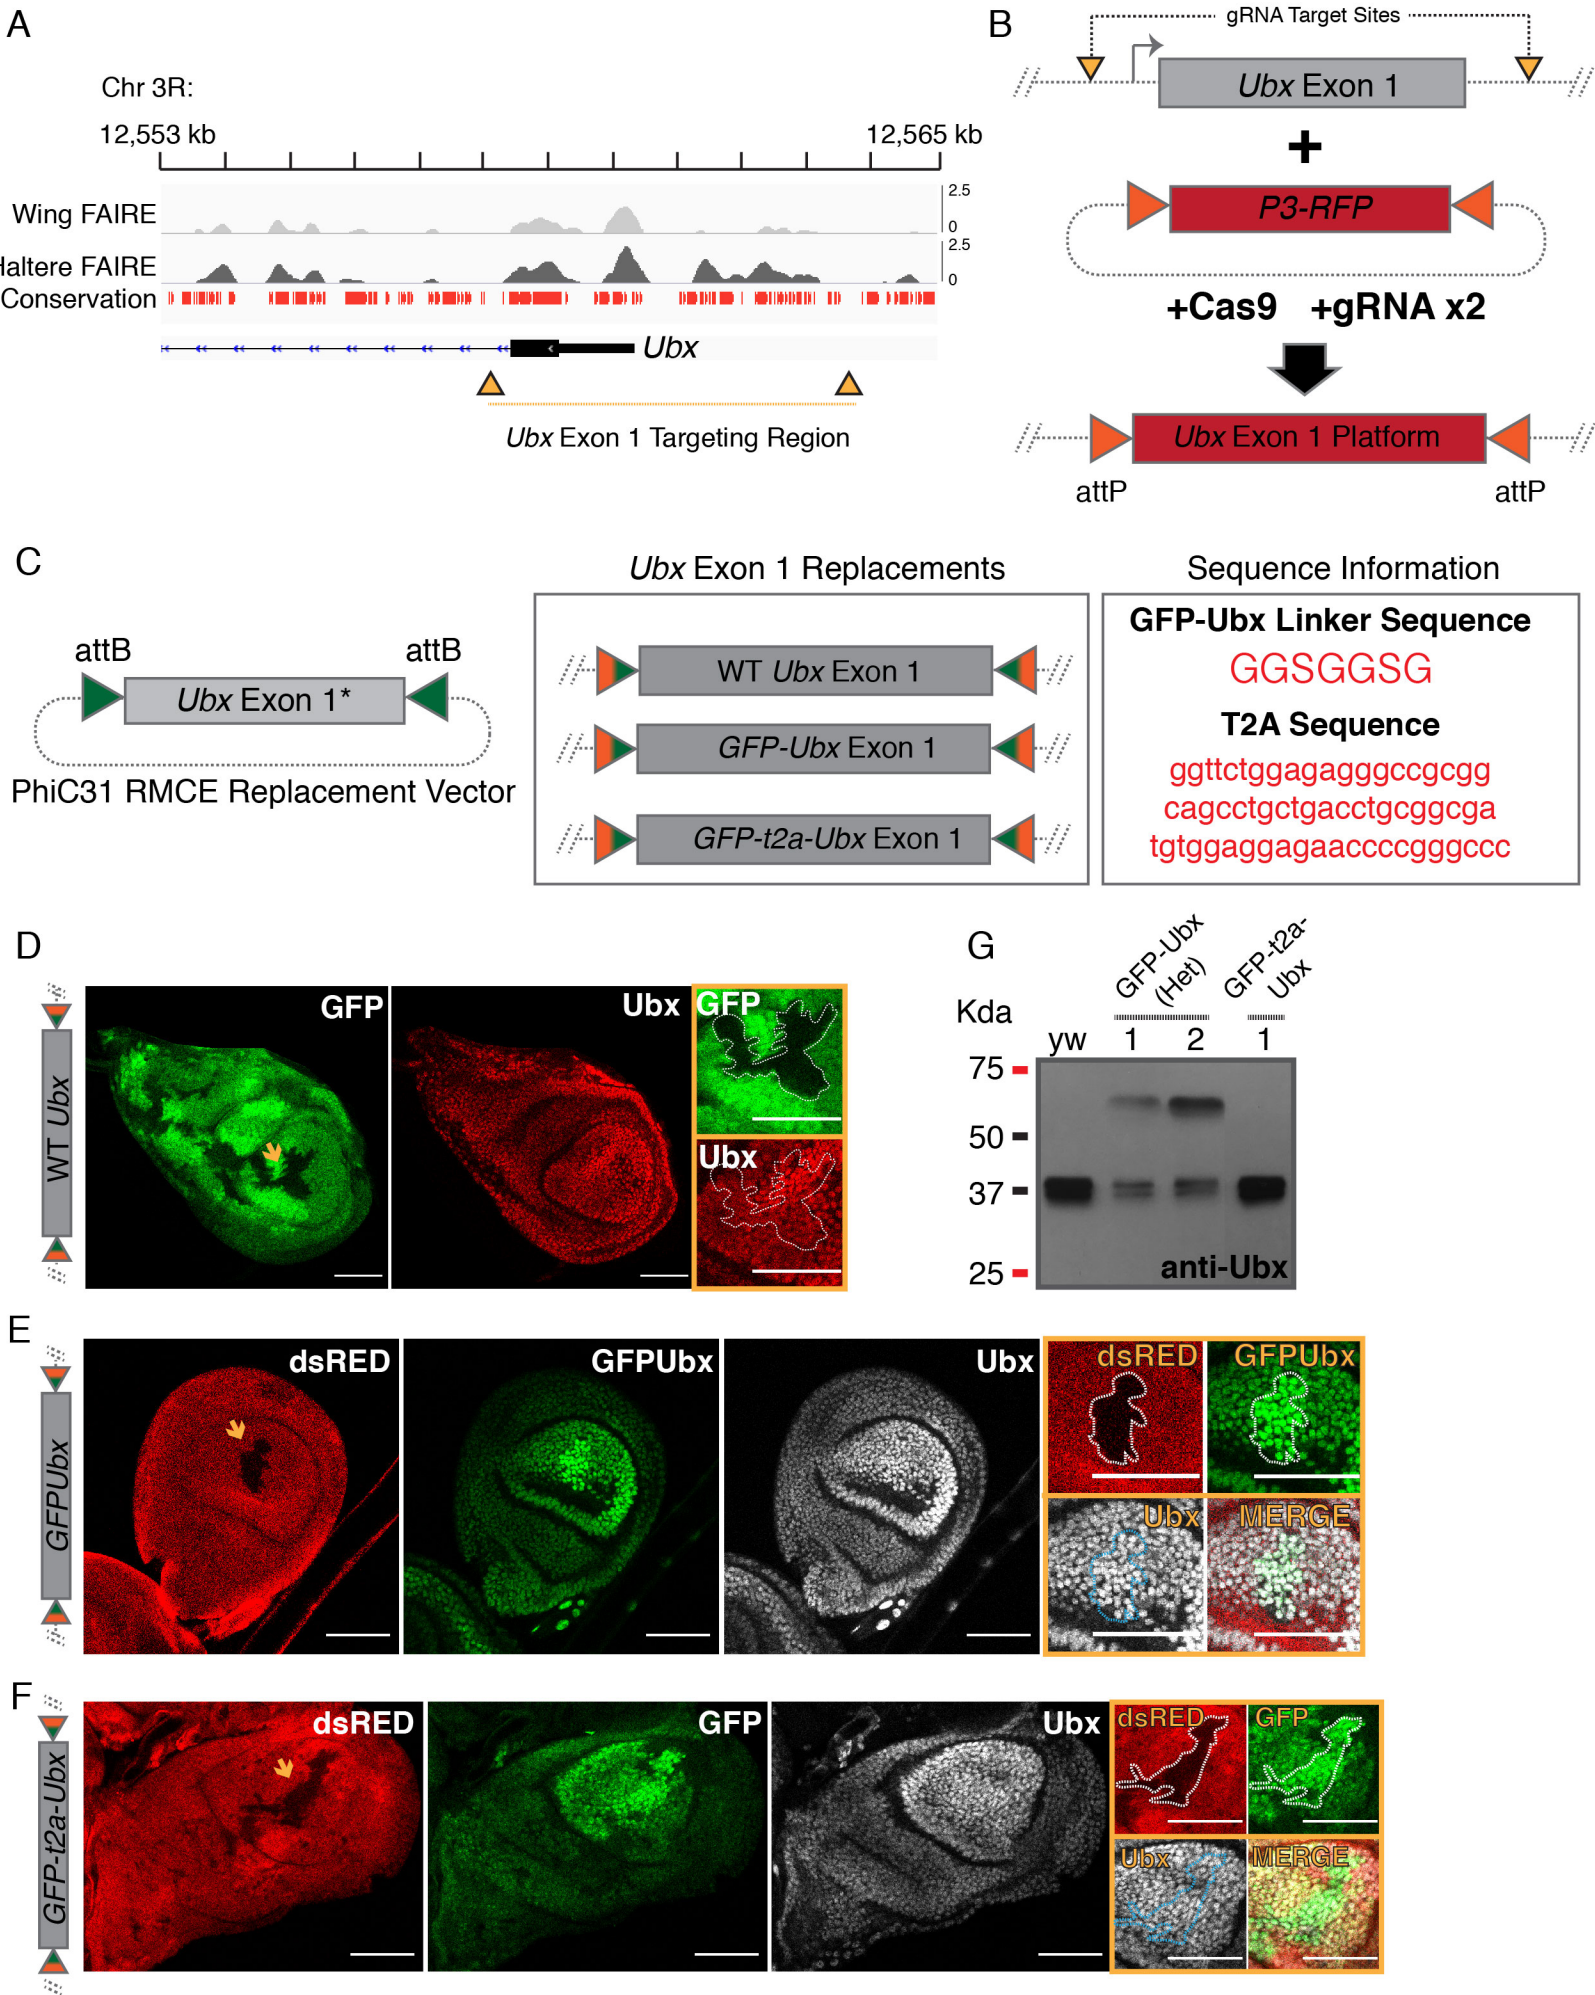

## 1 Supplemental Figure Legends

### 2 **Figure 1 Supplemental 1. Overview of Strategy to Quantify the Proximal/Distal**

3 **Bias of Ubx Expression. (A)** Analysis pipeline conducted within FIJI is shown.

4 Selection of whole disc region of interest (ROI), Distal ROI, and Proximal ROI is

5 followed by the measurement of the average intensity of Ubx within that ROI for each

6 slice in the stack. Black pixels are removed from the analysis to prevent skewing of the

7 average from differences in sizes of the ROI. **(B)** (Left) An analysis of a single haltere

8 disc is shown. Each dot represents the average intensity for each slice in the stack in

9 the whole disc (“Disc”), the proximal ROI, and the distal ROI. Dotted red line represents

10 the mean for each compartment; reported distal/proximal ratio is the distal

11 mean/proximal mean. **(C)** As shown in Figure 1. The mean average Ubx intensity for

12 each compartment from the single disc analysis is reported as a single point in the

13 multi-disc analysis. Individual discs are color-coded such that the compartment-

14 specific averages for each disc can be compared to one another. Dotted line is the

15 mean average intensity for each compartment.

16

17 **Figure 2 Supplemental 1. Additional *exd* mutant Clones. (A)** Ubx Immunostain in

18 haltere discs in which *exd* null clones (*exd*<sup>2</sup>) have been induced. An Exd immunostain,

19 in addition to a merge of Ubx/Exd, is shown. Clones are marked by a yellow arrow. **(B)**

20 Ubx immunostain in two haltere discs in which *exdRNAi* clones have been induced in

21 the background of a *Dcr2* mutant. An Exd immunostain, in addition to a merge of

22 Ubx/Exd, is shown. Clones are marked by a yellow arrow.

23

24 **Figure 3 Supplemental 1. Clonal Deletion of *abxFAIRE*.** (A) (Top) A schematic of the  
25 *abxFAIRE* region targeted and deleted. FAIRE accessibility peaks from McKay *et al.*  
26 (29) are shown in the wing and haltere. (Bottom) The  $\Delta abxFAIRE$  allele was generated  
27 by replacing the *abxFAIRE* sequence with a minimal cloning site (MCS) sequence using  
28 PhiC31-based RMCE. Through this method scars are left on either side of the  
29 replacement. (B) Mitotic clones homozygous for  $\Delta abxFAIRE$  (GFP-) were induced at  
30 48hr after egg-laying (AEL). Clones in the posterior compartment (*EnGal4*-RFP+) do not  
31 show a defect in Ubx expression. Clone is outlined in yellow. (B') A zoomed in image of  
32 the clone from B. Merges of Ubx/GFP and *EnGal4*-RFP/GFP are shown. Scale bars are  
33 50 micron in size.

34

35 **Figure 4 Supplemental 1. Loss of Cluster 1 binding sites Results in Loss of Ubx**  
36 **Binding.** (A) (Left) LacZ immunostain of haltere discs containing either an *abxN-lacZ*<sup>WT</sup>  
37 transgene (top) or an *abxN-lacZ*<sup>Cluster1-Kill</sup> transgene. (Right) LacZ immunostain of discs of  
38 wildtype and mutant *abxN-lacZ* genotype upon induction of Ubx null clones (*Ubx*<sup>9-22</sup>). A  
39 GFP immunostain, in addition to a merge of GFP/LacZ, is shown. Clones are GFP-  
40 negative. (B) EMSA assay of Ubx-Exd-Hth<sup>HM</sup> *in vitro* binding to a probe containing the  
41 Cluster 1 binding sites (left) and the probe mutated to abrogate the Cluster 1 binding  
42 sites (right). Gray arrow points to the shifted trimer band. (C) Chromatin  
43 Immunoprecipitation (ChIP-qPCR) was performed on haltere discs from transgenic flies  
44 containing either the *abxN-lacZ*<sup>WT</sup> reporter (top) or the *abxN-lacZ*<sup>Cluster1-Kill</sup> reporter  
45 (bottom). % Input for an anti-Ubx IP and an IgG Isotype control IP are shown for three

46 genomic regions: (1) the endogenous *abx* CRM, (2) the transgenic CRM, and (3) an  
47 intergenic region on chromosome 2 that serves as a negative control. Averages and  
48 standard deviation from three independent IPs are reported.

49

50 **Figure 5 Supplemental 1. Generation of Clones Homozygous for Wildtype and**  
51 **Mutant *abxN* replacement alleles. (A)** GFP and Ubx immunostains in haltere discs in  
52 which clones homozygous for *abxN* replacement alleles were induced 48hr AEL.  
53 Clones are GFP-negative and denoted with a yellow arrow. Zoomed images of single  
54 clones (outlined) are shown to the right. All scale bars shown are 50 micron in size.

55

56 **Figure 6 Supplemental 1. Multiple Low Affinity Ubx/Exd Binding Sites are**  
57 **Required for PD Bias Formation. (A)** Table of *NRLB*-predicted Ubx/Exd binding sites  
58 in *abxFAIRE* that have been mutated. Many predicted sites fall within clusters so we  
59 report the number of binding sites within each cluster. Wildtype and mutated  
60 sequences are shown. Lowercase letters are bases that were mutated. Relative  
61 affinities and the category (Low, High) for each binding site or cluster are given. **(B)**  
62 GFP and Ubx immunostains in haltere discs in which clones homozygous for *abxFAIRE*  
63 replacement alleles were induced 48hr AEL. Clones are GFP-negative and denoted  
64 with a yellow arrow. Zoomed images of single clones (outlined) are shown to the right.  
65 All scale bars shown are 50 micron in size.

66

67



68 **Figure 6 Supplemental 2. Multiple Low Affinity Ubx/Exd Binding Sites are**  
69 **Required for PD Bias Formation. (A)** Schematic of *abxFAIRE* replacements tested in  
70 **B.** The Targeted Region<sup>4kb</sup> replacement platform was used to generate either a wildtype  
71 *abxFAIRE* (+scars) allele or an allele with only the ~500 bp *abxN* wildtype or Cluster 1<sup>kill</sup>  
72 sequence, deleting the remaining ~3.5 kb *abxFAIRE* sequence. **(B)** Ubx immunostain in  
73 haltere discs homozygous for the specified *abxFAIRE* replacement alleles. A DAPI  
74 nuclear stain is shown for each. All scale bars shown are 50 micron in size.

75  
76 **Figure 7 Supplemental 1. CRISPR Targeting of Ubx Exon 1. (A)** Genome browser  
77 screenshot around *Ubx* exon 1. FAIRE accessibility peaks in the wing and haltere (from  
78 McKay *et al.* (29)) are shown for reference. Conservation track was downloaded from  
79 UCSC. No red denotes a lack of evolutionary conservation with twelve other  
80 *Drosophila* species, mosquito, honeybee and red flour beetle. Yellow triangles denote  
81 Cas9/gRNA target sites; and the yellow bar denotes the region replaced. **(B)** Schematic  
82 of a two-step *Ubx* exon 1 replacement strategy. gRNA sites were chosen in non-  
83 conserved regions surrounding *Ubx* exon 1. A dual-gRNA expressing plasmid was  
84 injected along with a donor cassette containing an attP-flanked fluorescent selection  
85 marker (*P3-RFP*) into *nanos-Cas9* flies. The resulting “*Ubx* Exon 1 Replacement  
86 Platform” serves as a means to insert modified versions of *Ubx* using PhiC31-based  
87 RMCE. **(C)** (Left) Schematic of RMCE replacement cassette. (Right) Schematic of  
88 replacement alleles generated and sequence information for the linker used in the  
89 GFP-Ubx fusion (amino acids) and the T2A sequence used (DNA). **(D)** GFP native

90 fluorescence and a Ubx immunostain in haltere discs in which clones homozygous for  
91 the wildtype *Ubx* exon 1 replacement allele were induced. Clones are GFP-negative  
92 and marked with a yellow arrow. Cropped images of single clones (outlined) are shown.  
93 **(E)** GFPUbx native fluorescence, and dsRed and Ubx immunostains in haltere discs in  
94 which clones homozygous for the GFPUbx fusion allele were induced. Clones are  
95 dsRed-negative and marked with a yellow arrow. Cropped images of a single clone  
96 (outlined) are shown. **(F)** GFPUbx native fluorescence, and dsRed and Ubx  
97 immunostains in haltere discs in which clones homozygous for the *GFP-t2a-Ubx* allele  
98 were induced. Clones are dsRed-negative and marked with a yellow arrow. Cropped  
99 images of a single clone (outlined) are shown. **(G)** An anti-Ubx immunoblot on protein  
100 derived from the following genotypes: *yw* (lane 1), *GFP-Ubx* heterozygous (lanes 2, 3),  
101 and *GFP-t2a-Ubx* (lane 4). The lower band is Ubx and the upper band is the GFPUbx  
102 fusion. All scale bars shown are 50 micron in size.

103

104

105
